# 1 **Modelling the distribution of *Aedes aegypti* and *Aedes albopictus***

## 2 **using climate, host density and interspecies competitive effects**

3 Bingyi Yang<sup>1,2</sup>, Brooke A. Borgert<sup>1,2</sup>, Barry W. Alto<sup>3</sup>, Carl K. Boohene<sup>4</sup>, Peter Brabant<sup>5</sup>, Joe  
4 Brew<sup>6</sup>, Kelly Deutsch<sup>7</sup>, James T. DeValerio<sup>8</sup>, Rhoel R. Dinglasan<sup>2,9</sup>, Daniel Dixon<sup>10</sup>, Joseph  
5 M. Faella<sup>11</sup>, Sandra L. Fisher-Grainger<sup>12</sup>, Gregory E. Glass<sup>2,13</sup>, Reginald Hayes<sup>14</sup>, David F.  
6 Hoel<sup>15</sup>, Austin Horton<sup>16</sup>, Agne Janusauskaite<sup>17</sup>, Bill Kellner<sup>18</sup>, Moritz U.G. Kraemer<sup>19,20,21</sup>, Eric  
7 Leveen<sup>22</sup>, Keira J. Lucas<sup>23</sup>, Johana Medina<sup>24</sup>, Rachel Morreale<sup>15</sup>, William Petrie<sup>24</sup>, Robert C.  
8 Reiner Jr.<sup>25</sup>, Michael T. Riles<sup>26</sup>, Henrik Salje<sup>27</sup>, David L. Smith<sup>25</sup>, John P. Smith<sup>28</sup>, Amy  
9 Solis<sup>29</sup>, Jason Stuck<sup>30</sup>, Chalmers Vasquez<sup>24</sup>, Katie F. Williams<sup>31</sup>, Rui-De Xue<sup>10</sup>, Derek A.T.  
10 Cummings<sup>1,2\*</sup>

### 11 **Affiliations**

- 12 1. Department of Biology, University of Florida, Gainesville, FL 32611
- 13 2. Emerging Pathogens Institute, University of Florida, Gainesville, FL 32611
- 14 3. Department of Entomology and Nematology, Florida Medical Entomology Laboratory,  
15 University of Florida, Vero Beach, FL
- 16 4. Polk County, Florida, Mosquito Control
- 17 5. South Walton County Mosquito Control District
- 18 6. Institut de Salut Global de Barcelona, Carrer del Rosselló, 132, 08036 Barcelona,  
19 Catalonia, Spain
- 20 7. Orange County Government, Florida, Orange County Mosquito Control Division
- 21 8. University of Florida Institute of Food and Agricultural Sciences, Bradford County  
22 Extension, Starke, FL 32091
- 23 9. Department of Infectious Diseases and Immunology, University of Florida,  
24 Gainesville, FL 32611
- 25 10. Anastasia Mosquito Control District, 120 EOC Drive, St. Augustine, FL 32092 120  
26 EOC Drive, St. Augustine, FL 32092
- 27 11. Brevard County, Florida, Mosquito Control
- 28 12. Hernando County, Florida, Mosquito Control
- 29 13. Department of Geography, University of Florida, Gainesville, FL 32611
- 30 14. Palm Beach County, Florida, Mosquito Control
- 31 15. Lee County Mosquito Control District
- 32 16. Gulf County, Florida, Mosquito Control
- 33 17. Pasco County Mosquito Control District
- 34 18. Citrus County Mosquito Control District
- 35 19. Harvard Medical School, Boston, MA 02115
- 36 20. Computational Epidemiology Lab, Boston Children's Hospital, Boston, MA 02115
- 37 21. Department of Zoology, University of Oxford, Oxford, United Kingdom
- 38 22. Florida Department of Agriculture and Consumer Services
- 39 23. Collier Mosquito Control District, Naples FL 34104
- 40 24. Miami-Dade County, Florida, Mosquito Control
- 41 25. Institute for Health Metrics and Evaluation, University of Washington, Seattle, WA  
42 98121
- 43 26. Beach Mosquito Control District

44 27. Mathematical Modelling Unit, Institut Pasteur, Paris 75015, France

45 28. Florida State University, Panama City, FL 32405

46 29. Clarke: Aquatic and Mosquito Control Services and Products

47 30. Pinellas County, Florida, Mosquito Control

48 31. Manatee County Mosquito Control District

#### 49 **Corresponding authors**

50 \* Derek A.T. Cummings: [datc@ufl.edu](mailto:datc@ufl.edu)

51 **Keywords:** *Aedes aegypti*; *Aedes albopictus*; occurrence; interspecific competition;

52 abundance; forecasting; statistics

#### 53 **ABSTRACT**

54 Florida faces the challenge of repeated introduction and autochthonous transmission

55 of arboviruses transmitted by *Aedes aegypti* and *Aedes albopictus*. Empirically-

56 based predictive models of the spatial distribution of these species would aid

57 surveillance and vector control efforts. To predict the occurrence and abundance of

58 these species, we fit mixed-effects zero-inflated negative binomial regression to a

59 mosquito surveillance dataset with records from more than 200,000 trap days,

60 covering 73% of the land area and ranging from 2004 to 2018 in Florida. We found

61 an asymmetrical competitive interaction between adult populations of *Aedes aegypti*

62 and *Aedes albopictus* for the sampled sites. Wind speed was negatively associated

63 with the occurrence and abundance of both vectors. Our model predictions show

64 high accuracy (72.9% to 94.5%) in the validation tests leaving out a random 10%

65 subset of sites and data from 2018, suggesting a potential for predicting the

66 distribution of the two *Aedes* vectors.

67

## 68 INTRODUCTION

69 *Aedes* mosquitoes, in particular, *Aedes aegypti* (Linnaeus) and *Aedes albopictus*  
70 (Skuse), are the primary vectors of multiple arboviruses including dengue virus  
71 (DENV), Zika virus (ZIKV), yellow fever virus, and chikungunya virus  
72 (CHIKV)(Bargielowski and Lounibos, 2016; Kotsakiozi et al., 2017; Lounibos and  
73 Kramer, 2016). The incidence of these viruses in humans is driven, in part, by the  
74 close overlapping habitats of humans and these vectors (Charrel et al., 2014). In the  
75 absence of effective vaccines, reducing contact between mosquitoes and humans  
76 through targeted mosquito control is regarded as the most effective approach to  
77 reduce risk of mosquito-borne arbovirus transmission. There have been several  
78 efforts to create large-scale estimates of the spatial presence and abundance of  
79 these vectors using a variety of collection methods and data from literature reports  
80 and entomological surveys of mosquito occurrence. Global maps have been  
81 generated using climate and socio-economic variables, relying on a strong  
82 dependence of mosquito populations to temperature and rainfall (Brady et al., 2014;  
83 Kraemer et al., 2015b; Leta et al., 2018). These efforts have uncertainty associated  
84 with publication bias and variability of collection methods. Large-scale data collected  
85 by standardized surveillance methods could improve the certainty and precision of  
86 occurrence and abundance maps. Here, we use a dataset covering around 102,000  
87 km<sup>2</sup> (73%) and more than 200,000 trap days spanning 17 years of observation (Figs  
88 1 and S7). We built a mixed-effects zero-inflated negative binomial (ZINB) model to  
89 characterize and predict the occurrence and abundance of *Ae. aegypti* and *Ae.*  
90 *albopictus*, simultaneously using climate and human population density data.

91

92 Florida has suffered from the introduction and autochthonous transmission of DENV  
93 (Muñoz-Jordán et al., 2013; Teets et al., 2014), CHIKV (Kendrick et al., 2014) and  
94 ZIKV (Grubaugh et al., 2017; Likos et al., 2016) and remain at high risk of  
95 transmission due to repeated pathogen introductions, high densities of *Ae. aegypti*  
96 and *Ae. albopictus* (Kraemer et al., 2015b) and favorable meteorological conditions  
97 (Grubaugh et al., 2017; Monaghan et al., 2016). Studies have shown a positive  
98 relationship between human Zika and dengue cases and larger *Ae. aegypti*  
99 populations in urban areas (Bowman et al., 2014; Grubaugh et al., 2017). Therefore,  
100 characterizing the population size of the two *Aedes* species over time and space  
101 could aid in examining the risk of local arbovirus transmission and spread in Florida  
102 and inform more effective and targeted mosquito control efforts.

103

104 Although coexistence of the two *Aedes* vectors is reported (Lounibos et al., 2016),  
105 declining populations and displaced habitats of *Ae. aegypti* have been observed in  
106 several places, including Florida (Bagny et al., 2009; Kaplan et al., 2010; Lounibos  
107 and Kramer, 2016; O'Meara et al., 1995). In particular, the habitats of *Ae. aegypti*  
108 were restricted to urban areas while those of *Ae. albopictus* were found to increase  
109 in suburban and rural areas in Florida (Lounibos, 2002). The proposed mechanisms  
110 for the displacements of *Ae. aegypti* include species interactions such as the  
111 superiority of *Ae. albopictus* to compete for resources at the larval stage and  
112 asymmetric sterilization at the adult stage after interspecific mating which favors *Ae.*  
113 *albopictus* (Bargielowski and Lounibos, 2016; Juliano, 2009; Lounibos and Kramer,  
114 2016). Previous studies modelled the current spatial distribution of *Ae. aegypti* and  
115 *Ae. albopictus* by applying boosted regression trees to a comprehensive global  
116 database of *Aedes* occurrence (Kraemer et al., 2015a, 2015b) and characterized the

117 spatial and temporal abundance of the two *Aedes* species in a local southern Florida  
118 county (Reiskind and Lounibos, 2013). However, these studies, which estimated the  
119 distribution and abundance of *Aedes*, are limited because of the minimal amount of  
120 data from standardized collections of mosquito populations and failure to consider  
121 the species interactions between *Ae. aegypti* and *Ae. albopictus* (Lounibos and  
122 Juliano, 2018). Additionally, inconsistent findings on the associations between their  
123 distribution and meteorological factors were reported according to a recent  
124 systematic review (Sallam et al., 2017).

125

126 The objective of this study was to simultaneously characterize the occurrence and  
127 abundance of the *Ae. aegypti* and *Ae. albopictus* mosquitoes using the routine  
128 mosquito surveillance data in Florida. To estimate if mosquitoes were present or not  
129 and if present, the number of adults in each trap location, a mixed-effects zero-  
130 inflated negative binomial (ZINB) regression was performed. Different predictors or  
131 factors were examined, like climate and human population density covariates, and  
132 the potential interaction between *Ae. aegypti* and *Ae. albopictus* based on their  
133 spatial and temporal abundance. Predictions on occurrence of *Ae. aegypti* and *Ae.*  
134 *albopictus* from models were assessed with and without abundance information to  
135 determine if real-time predictions based solely on climate data and human population  
136 density information provided accurate predictions.

## 137 **RESULTS**

138 In total, the longitudinal training dataset included 132,088 weekly records from 1,246  
139 unique sites for *Ae. aegypti* and *Ae. albopictus*, respectively, covering 33 out of 67  
140 counties. The dataset includes 53% of the land area in Florida and from 2004 to

141 2018 (Table 1, Figs. S1, S2 and S5). Traps were typically set for one day but a  
142 minority of collaborators reported counts from a trap that was set for multiple days  
143 (7.4%). Approximately 87.4% and 84.8% of trap episodes reported no adults  
144 collected for *Ae. aegypti* or *Ae. albopictus*, respectively. The majority (81.4%) of  
145 traps used were light traps, and the remaining 7.3% and 11.3% of traps used were  
146 BG Sentinel traps or other mosquito traps (Table S4), respectively (Table 1) (see  
147 more details for traps in the supplementary). A wider range and higher trap rate was  
148 reported for *Ae. albopictus* compared to *Ae. aegypti* in Florida, and as expected from  
149 previous studies, most *Ae. aegypti* were reported in southern Florida (Figs. 1 and  
150 S1). Both *Ae. aegypti* and *Ae. albopictus* were trapped more often between May to  
151 October (Fig. S1 and S2). The median human population density of the locations  
152 where the traps were set is 480.8 persons per km<sup>2</sup> (Interquartile range (IQR), 112.5  
153 to 1165.2 km<sup>2</sup>) (Fig S3). The median weekly average wind speed was 5.4 meter per  
154 second (IQR, 4.5 to 6.6 m/s), and the median relative humidity was 76.7% (IQR, 73.1  
155 to 80.1 %) (Fig S3). The minimum temperature of the trap episodes ranged from  
156 18.7 to 25.8 °C with median of 23.0 °C. The median difference of predicted  
157 maximum temperature on minimum temperature was 0 °C (IQR, -0.5 to 0.5 °C) (Fig  
158 S3).

### 159 **Presence and abundance of *Aedes***

160 The results from ZINB regression suggested the probability of presence of *Ae.*  
161 *aegypti* and *Ae. albopictus* in the current week was positively associated with the  
162 previous presence of its own species and the other species (Table 2). The  
163 abundance of both *Aedes* species was more likely to be higher if a higher  
164 abundance was reported for its own species (e.g. Incidence rate ratio (IRR) 1.03 and

165 1.02 for one week prior for the two vectors, respectively) (Table 2). The abundance  
166 of *Ae. aegypti* was negatively associated with the abundance of *Ae. albopictus* in the  
167 last three weeks (IRR: 0.992, 0.994 and 0.990 for one, two and three weeks earlier,  
168 respectively), while the abundance of *Ae. albopictus* seemed to be not associated  
169 with the previous abundance of *Ae. aegypti* (Table 2).

170

171 We found both the presence (Odds ratio (OR): 0.98, 0.95 to 1.01 and 0.97, 0.95 to  
172 0.99, respectively) and abundance (IRR: 0.97, 0.96 to 0.99 and 0.97, 0.95 to 0.98,  
173 respectively) of *Ae. aegypti* and *Ae. albopictus* were negatively associated with the  
174 average wind speed of the week. Minimum temperature was positively associated  
175 with the occurrence (OR: 1.01 for *Ae. aegypti* and 1.08 for *Ae. albopictus*) and the  
176 abundance (IRR: 1.13 and 1.09 respectively) of both species. Maximum temperature  
177 was found to be negatively associated with the occurrence of *Ae. aegypti* (OR: 0.91,  
178 0.87 to 0.95) but positively associated with the occurrence of *Ae. albopictus* (OR:  
179 1.04, 1.00 to 1.08) (Table 2). We found the relative humidity was negatively  
180 associated with the abundance of *Ae. aegypti* (IRR: 0.99, 0.98 to 1.00) and the  
181 occurrence of *Ae. albopictus* (IRR: 0.99, 0.98 to 0.99). Model estimates using NOAA  
182 climate data were similar with our main results, except for the positive associations  
183 between maximum temperature and the abundance and presence for both species  
184 (Table S1). Greater precipitation was positively associated with the abundance for  
185 both *Ae. aegypti* (IRR: 1.42, 1.26 to 1.59) and *Ae. albopictus* (IRR: 1.09, 0.99 to  
186 1.20), but not associated with the probability of presence (OR: 0.85, 0.69 to 1.05 and  
187 1.05, 0.94 to 1.19, respectively) (Table S1).

188

189 Both the probability of presence (OR: 0.95, 0.94 to 0.97) and abundance (IRR: 0.98,  
190 0.97 to 1.00) of *Ae. albopictus* were negatively associated with a higher human  
191 population density, while the probability of the presence of *Ae. aegypti* was positively  
192 associated with human population density (OR: 1.05, 1.03 to 1.07). We also found  
193 substantial heterogeneities of presence and abundance of these two *Aedes* species  
194 across trap sites and counties (Table 2). The greatest heterogeneity was found with  
195 the presence at a county level for both *Ae. aegypti* (random effects (RE): 12.27) and  
196 *Ae. albopictus* (RE: 6.592).

### 197 **Performance of model fits to the longitudinal training dataset**

198 We compared the predictions from the main ZINB model with observed presence  
199 and abundance from the longitudinal training datasets (Fig. 2 and Fig. S6). Overall,  
200 our model fits well with both the occurrence and abundance estimates for *Ae.*  
201 *aegypti* and *Ae. albopictus* (Fig. 2). We observed that 91.1% and 84.9% of the  
202 predicted presence was consistent with the observed presence of *Ae. aegypti* and  
203 *Ae. albopictus*, respectively. Similarly, 83.8% and 77.0% of the predicted abundance  
204 was correlated with the observations, while 90.1% and 86.5% of the predicted  
205 abundance differed by  $\pm 1$  per trap day from the observations (Fig. 2C-D). The values  
206 of Moran's I are 0.47 ( $p < 0.01$ ) and 0.08 ( $p = 0.02$ ) for *Ae. aegypti* and *Ae.*  
207 *albopictus*, respectively, and is -0.03 ( $p = 0.81$ ) for *Ae. aegypti* after removing data  
208 from Miami-Dade. Temporal differences were relatively larger during May and  
209 September, when the observed average trap rates were also higher, for both species  
210 (Fig. S6).



## 211 **Performance of model in validation sets**

212 For both spatial (Fig. 3A) and temporal (Fig. 43) test datasets, the model predictions  
213 are highly consistent with the observed presence of both *Ae. aegypti* (AUC: 0.93 and  
214 0.92 for spatial and temporal predictions, respectively) and *Ae. albopictus* (AUC:  
215 0.84 and 0.81 for spatial and temporal predictions, respectively). Overall, 86.2% and  
216 82.1% of the predicted abundance were consistent with the observations for the  
217 spatial prediction of *Ae. aegypti* and *Ae. albopictus* (Fig. 3B-C), respectively, while  
218 72.9% and 94.5% of the predictions were correct for the temporal predictions (Fig.  
219 3E-F).

220

221 We fit another ZINB model to the longitudinal training dataset without using  
222 information on the previous presence and abundance of both species, and applied  
223 the model to predict the no abundance testing dataset, which failed on the four  
224 consecutive four-week criteria. The no abundance testing dataset has total 45,535  
225 trap episodes collected from 2,791 unique sites in 48 counties (Figs. S4 and S5).  
226 The model provided good predictions in both presence (AUC: 0.90 for *Ae. aegypti*  
227 and 0.85 for *Ae. albopictus*) and abundance (82.8% and 70.2% right predictions,  
228 respectively) for the two *Aedes* species (Fig. S7).

229

230 Using our models, we predicted the number of *Ae. aegypti* and *Ae. albopictus* that  
231 would be expected to be found in traps in all points in the state. Fig. 4 shows  
232 predictions created using the “no abundance model” for August 1, 2018 incorporating  
233 random effects representing systematic differences in surveillance by county (Fig. 4  
234 A and B) and only incorporating fixed effects (Fig. 4 C and D). BG traps were

235 assumed to be used for all sites. Predictions in Fig. 4 present our estimates  
236 attempting to eliminate the impact of systematic differences in surveillance.

## 237 **DISCUSSION**

238 We built models using more than 132,000 routine mosquito surveillance records from  
239 33 counties in Florida collected from 2004 to 2018, to characterize and predict the  
240 occurrence and abundance of *Ae. aegypti* and *Ae. albopictus*. Our model performed  
241 well, particularly considering the stochastic nature of mosquito populations, trap  
242 efficiency and small-scale trap locations. We modelled random effects across sites  
243 and counties to account for inconsistencies and randomness and found the highest  
244 random effect was for the probability of presence at the county level, suggesting  
245 great heterogeneity of occurrence across counties possibly down to differences in  
246 surveillance and domestic mosquito control across counties.

247

248 Our results suggest a broad distribution of *Ae. albopictus* in Florida, while *Ae.*  
249 *aegypti* was more likely to be found in counties in southern Florida, a pattern similar  
250 to reports during the past two decades (Lounibos et al., 2016). This is also consistent  
251 with previous observations about the declining population of *Ae. aegypti* after the  
252 invasion of *Ae. albopictus* in the Southern United States (Bonizzoni et al., 2013;  
253 Lounibos, 2002). However, there is some evidence to suggest limited local  
254 recoveries of *Ae. aegypti* in relation to *Ae. albopictus*, in part, attributable to evolution  
255 of resistance to satyryzation (Bargielowski et al., 2013; Bargielowski and Lounibos,  
256 2016; Hopperstad and Reiskind, 2016; Lounibos et al., 2016). Our findings on the  
257 positive association between the probability of presence of adult mosquitoes of the  
258 two *Aedes* species suggest their niches have some overlap particularly in urban

259 areas (Lounibos and Juliano, 2018). This is supported by the observed coexistence  
260 of *Ae. aegypti* and *Ae. albopictus* in Florida (Bonizzoni et al., 2013; Lounibos and  
261 Kramer, 2016; Reiskind and Lounibos, 2013) and the similar breeding behavior of  
262 the two species (Hashim et al., 2018). We also found evidence of competitive  
263 interactions between the two species. The abundance of *Ae. aegypti* was negatively  
264 associated with the previous abundance of *Ae. albopictus*, with the greatest effect  
265 size observed for the abundance of *Ae. albopictus* during the previous three-week  
266 period. A previous study revealed the breeding preference of *Ae. aegypti* in habitats  
267 without *Ae. albopictus* (Hashim et al., 2018). Our findings support the hypothesis that  
268 the two *Aedes* species can coexist but the abundance of adult *Ae. aegypti* are  
269 suppressed due to its failure to outcompete at the larval stage and/or the impact of  
270 interspecific mating (Bargielowski et al., 2013; Juliano, 2009; Lounibos and Kramer,  
271 2016). Evolution of resistance to interspecific mating (i.e., satyrization-resistance) in  
272 *Ae. aegypti* populations is likely to promote coexistence.(Bargielowski and  
273 Lounibos, 2016) Future control efforts targeting the *Aedes* species, especially *Ae.*  
274 *albopictus*, need to take into account the risk of resurgence of *Ae. aegypti*, which has  
275 been documented in Brazil (Kotsakiozi et al., 2017) , and can be possible in Florida  
276 considering recent reports of the rapid evolution of satyrization-resistant *aegypti*  
277 (Bargielowski and Lounibos, 2016), coupled with an observed increased in  
278 insecticide resistance as compared to *Ae. albopictus* (Estep, et al., unpublished)  
279 (“Distribution Maps – Florida Mosquito Information,” n.d.).

280

281 We found the presence and abundance of *Ae. albopictus* are negatively associated  
282 with human population density, while the presence of *Ae. aegypti* was positively  
283 associated with the human population density, which matches with reports that

284 anthropophilic *Ae. aegypti* are more likely to be found in urban areas and the *Ae.*  
285 *albopictus* has wider range of habitats including peri-urban, vegetated and rural  
286 areas (Lounibos and Kramer, 2016; Metzger et al., 2017), mostly due to its wide  
287 range of host preference and a greater adaptation to different climates (Bonizzoni et  
288 al., 2013). Land cover status, which is an important predictor of distribution of these  
289 species by other reports (Kraemer et al., 2015b; Rey et al., 2006), was not included  
290 in our main analysis as it may be associated with the human population density and  
291 the vast majority of the *Ae. aegypti* were collected in developed areas with a large  
292 human presence, consistent with other studies (Rodrigues et al., 2015; Tsai and  
293 Teng, 2016). The observed positive association between human and *Ae. aegypti*  
294 density has practical implications for targeted mosquito control because these areas  
295 represent the greatest risk for arboviral infections (e.g., dengue (Padmanabha et al.,  
296 2012)).

297

298 Major presence of both species between May to October has also been reported  
299 previously and corresponds to Florida's rainy season and associated availability of  
300 breeding sites, and abiotic factors such as temperature (Reiskind and Lounibos,  
301 2013). Related to this, the negative association between wind speed and the  
302 presence and abundance of both species analysis can include some explanations  
303 such as high wind speed hindering the effective trapping of the mosquitoes;  
304 therefore, traps are more likely to have no or fewer collections of mosquitoes during  
305 windy days. Also, mosquito activity and therefore host-seeking have been shown to  
306 be affected by higher wind speeds; presumably due to the combined effect of  
307 affected flight distance and pattern as well as the poor dispersal of the CO<sub>2</sub> plume for  
308 both short and long distances.

309

310 Our results suggest positive associations between temperature and observed  
311 abundance of adult *Ae. aegypti* and *Ae. albopictus* when using the NOAA data, while  
312 inconsistent findings on the association between maximum temperature and the  
313 abundance of *Ae. aegypti* was found when using the NASA data. A study suggested  
314 higher tolerance of low temperature in adult *Ae. aegypti* compared to *Ae. albopictus*,  
315 leading to a relatively lower mortality of adult *Ae. aegypti* in low temperature and a  
316 milder effect of temperature on the presence of *Ae. aegypti* (Brady et al., 2013). One  
317 previous study observed that *Ae. albopictus* prefer to live in cooler areas in Florida  
318 (Bonizzoni et al., 2013). However, different local adaptations by these *Aedes* species  
319 to climatic changes were also reported both in and outside Florida (Lounibos and  
320 Kramer, 2016; Muttis et al., 2018). Despite these discussions with relation to habitat  
321 and mortality of the two *Aedes* vectors and temperature, seasonality can be used to  
322 predict the patterns of presence and abundance of these two *Aedes* species and the  
323 incidence of diseases transmitted by the these mosquito vectors (Monaghan et al.,  
324 2016; Reiskind and Lounibos, 2013; Xu et al., 2017).

325

326 We find a negative correlation between relative humidity the abundance of *Ae.*  
327 *aegypti* and the presence of *Ae. albopictus*. These findings support laboratory and  
328 field observations showing climate-driven egg mortality, with greater desiccation  
329 resistance of *Ae. aegypti* than *Ae. albopictus*, and species-specific responses in  
330 occupancy of containers with drier conditions favoring *Ae. aegypti* (Juliano et al.,  
331 2002; Lounibos et al., 2010; Mogi et al., 1996). Previous field studies have shown  
332 that dry periods are associated with disproportionately greater mortality of *Ae.*  
333 *albopictus* eggs than *Ae. aegypti* eggs in Florida (Juliano et al., 2002). Previous

334 laboratory studies revealed desiccation stress on survival of adult *Ae. aegypti* and  
335 *Ae. albopictus* with mortality increasing non-linearly with decreasing relative humidity  
336 (Hylton, 1967; Lucio et al., 2013; Schmidt et al., 2018). The complex relation  
337 between adult survival and relative humidity and the observed disproportional  
338 distribution of higher relative humidity in Florida could drive the negative association  
339 (Fig S3). In addition, higher relative humidity was usually associated with greater  
340 precipitation, which was found to be positively correlated with the abundance of both  
341 vectors, but not the probability of occurrence of the two species in the sensitivity  
342 analysis (Table S2). The effect of precipitation on the abundance of these two *Aedes*  
343 species was considered to be mediated by induced egg hatching in containers upon  
344 flooding and promotion of vegetation after raining (Reiskind and Lounibos, 2013;  
345 Sallam et al., 2017). Larger effect of precipitation on the abundance of *Ae. aegypti*  
346 than of *Ae. albopictus* could be because the preference of the former to use breeding  
347 in artificial containers for development of the immature stages, which are prone to  
348 have more obvious influence from precipitation compared to vegetation.

349

350 The probability and efficacy of capturing *Ae. aegypti* and *Ae. albopictus* by a BG-  
351 sentinel trap was found to be greater compared to light traps (Table 2), which is  
352 consistent with previous findings (Li et al., 2016; Williams et al., 2006). We  
353 performed a sensitivity analysis by fitting a ZINB model to data collected by BG  
354 sentinel traps only and found the robustness of our main results are seemingly  
355 unaffected not to be affected by the spatial distribution of BG sentinel traps (Fig. S8).  
356 In addition, we were not able to assess the role of attractants due to limited data  
357 available, which are believed to increase the capture efficacy of mosquitoes (de  
358 Ázara et al., 2013).

359

360 Our model which incorporates the previous abundance of heterospecific and  
361 conspecific *Aedes* species at a trap site demonstrates high accuracy in predicting  
362 the presence and abundance of *Ae. aegypti* and *Ae. albopictus* (Fig. 2 and Fig. S6).  
363 Analysis of long-term mosquito surveillance data is challenged by the excessive zero  
364 counts, which may be real absence, absence due to trap failure or adverse  
365 environmental conditions. The ZINB regression can model the two scenarios of  
366 absence simultaneously. However, variability in trap placement, efficiency of specific  
367 traps and other sources of variation in mosquito trapping practices may reduce our  
368 model performance. Performance tended to be lower when trapping rates were  
369 higher, while 97.1% (*Ae. aegypti*) and 96.8% (*Ae. albopictus*) of the differences  
370 between predicted and observed trap rate were within 5 per trap-day. A larger rate of  
371 inaccurate predictions was observed during months when trap rates of both  
372 mosquito species were higher, corresponding to the more dispersed variance of a  
373 higher trap rate. In addition, spatial autocorrelation was found for the model of *Ae.*  
374 *aegypti*, which was mainly due to the high autocorrelation between observations in  
375 Miami-Dade. The estimates and predictions are however not affected by the spatial  
376 autocorrelation, as suggested by the model fit to the longitudinal training dataset but  
377 removing data from Miami-Dade (Fig. S9 and Table S3).

378

379 Our model can be applied to predict spatial and temporal presence and abundance  
380 of *Ae. aegypti* and *Ae. albopictus* with good accuracy (Fig. 3). Although great  
381 variance was observed across counties and sites, we found that temporal prediction  
382 was more challenging for both species. Several sites first reported the occurrence or

383 resurgence of *Ae. aegypti* in 2017, indicating the dynamic niches of the mosquitoes,  
384 which hinders the distribution forecasting of the two vectors.

385

386 We found that our model performed well in external validation even without recent  
387 data on each species (“no abundance model”). This suggests that accurate real-time  
388 forecasts could be generated without gathering and collating abundance data in real-  
389 time, giving timely predictions of the occurrence of *Ae. aegypti* and *Ae. albopictus*  
390 using only site-specific meteorological and human population density data. Results  
391 from the “no abundance model” incorporating fixed effects only provide homogenous  
392 predictions, which are largely informed by the human population density, while the  
393 empirical data however suggested great variations in the abundance captured  
394 across the counties (Fig. 1). This is could be partially due to the systematic  
395 differences in trapping practices and surveillance across counties and can be  
396 captured by the model incorporating random effects.

397

398 Many efforts have been made to map the distribution of *Ae. aegypti* and *Ae.*  
399 *albopictus* at broad regional scales, which were highly dependent on vegetation and  
400 meteorological factors (Brady et al., 2014; Kraemer et al., 2015b; Leta et al., 2018).  
401 Our study observes suppression of adult population of *Ae. aegypti* by *Ae. albopictus*,  
402 highlighting the importance of including species interactions in future mapping work  
403 as underscored by recent studies, especially when considering predictions at high  
404 spatial resolution (Lounibos and Juliano, 2018). Otherwise, the distribution of *Ae.*  
405 *aegypti* would likely be overestimated since the two *Aedes* vectors shared many  
406 common abiotic conditions. The median changes of predicted trap rate of *Ae. aegypti*  
407 in Miami-Dade are -17.0% (IQR: -21.0 to 19.3%) and -24.6% (IQR: -28.2 to 8.3%)



408 when the trap rate for *Ae. albopictus* was 1 and 100 per trap-night, respectively. In  
409 addition, predictions from standardized longitudinal mosquito surveillance could aid  
410 to refine the distribution maps of these vectors by incorporating the seasonal pattern  
411 and real-time invasion activity. Finally, our empirical surveillance data can be used to  
412 validate and refine the local performance of large-scale maps. Integrating  
413 longitudinal surveillance could provide valuable information on absence and  
414 abundance, therefore reducing the sampling bias and disproportional weighting  
415 caused by presence only data (Wisz and Guisan, 2009).

416

417 There are several limitations to our study. First, our data has relatively more trap  
418 episodes during April to November, when the trap rate for these two vectors was  
419 often high. The estimated impact of low temperature on the presence and  
420 abundance of these two *Aedes* vectors may therefore be affected. Second, more  
421 than half of the records included in the main analysis are from Miami-Dade, St.  
422 Johns, Polk and Pinellas counties (Table S5). We have modelled the random effects  
423 across both sites and counties to account for the potential spatial variations of  
424 surveillance, which may improve the generalization capability of our conclusions. We  
425 were not able to characterize specific details of trap locations or other aspects of  
426 sites such as details of the built environment. These details might further improve  
427 forecasts.

428

429 Our models demonstrate potential for predicting the occurrence of *Ae. aegypti* and  
430 *Ae. albopictus*, to better inform targeted mosquito control efforts. Model predictions  
431 produced with and without the benefit of recent surveillance data were of high

432 accuracy suggesting that real-time forecasts could be produced with just climate  
433 data alone.

## 434 **MATERIALS AND METHODS**

### 435 **Mosquito surveillance data**

436 Statewide surveillance data on 16 *Aedes* species was obtained by networking with  
437 Florida's mosquito control districts, Clarke Scientific, the Florida Department of  
438 Agriculture Consumer Services, and the Florida Department of Health. Each control  
439 district is required to trap mosquitoes prior to conducting their control efforts by  
440 Florida Statutes 388 and 482. The traps were placed to acquire a representative  
441 sampling of the district including baseline traps placed in the same location annually,  
442 at risk areas due to environmental factors like increased standing water, locations  
443 within areas of known arbovirus transmission, and frequent areas of complaint.  
444 Information collected from these traps includes the speciated count and life phase of  
445 the trapped mosquitoes, date and duration of collection, type of trap, and coordinates  
446 of the trap sites. The collected mosquitoes were speciated according to standardized  
447 mosquito keys (Darsie and Morris, 2003). For missing data, the duration of collection  
448 was assumed to be one day, according to the common trapping practices, and  
449 coordinates were extracted from Google Maps based on the address of the site. The  
450 full dataset was aggregated to include data on adult *Ae. aegypti* and *Ae. albopictus*,  
451 two vectors related with arboviruses, on a week basis. The longitudinal training  
452 dataset for the zero-inflated negative binomial (ZINB) regression was extracted from  
453 the full dataset and included only data collected from sites with at least four  
454 consecutive weeks of surveillance and no missing explanatory variables.

## 455 **Abiotic variables**

456 To examine the potential effects of meteorological factors on the trap rate of the two  
457 *Aedes* species, temperature (°C), wind speed (meter per second) and relative  
458 humidity (%) were included in the model. We obtained the daily meteorological data  
459 for Florida from the NASA Prediction of Worldwide Energy Resources (“NASA  
460 Prediction of Worldwide Energy Resources,” n.d.) and applied the inverse distance  
461 weighting method (Pebesma and Gräler, 2014) to interpolate the daily weather raster  
462 of Florida with a 5 km ×5 km resolution. We also conducted a sensitivity analysis by  
463 using meteorological data from National Oceanic and Atmospheric Administration  
464 (NOAA).(National Oceanic and Atmospheric Administration, 2016) The weekly  
465 average of weather conditions was calculated as the mean of the weather conditions  
466 on the days the traps were collected. To account for the collinearity of the maximum  
467 and minimum temperature, we used the residuals of the linear regression of  
468 maximum temperature on minimum temperature as a proxy of the maximum  
469 temperature in the model, which was calculated as  $\Delta T_{max} = T_{max} - (\alpha + \beta T_{min})$ ,  
470 where  $T_{max}$  and  $T_{min}$  denoting the observed maximum and minimum temperature,  
471 respectively, while  $\alpha$  and  $\beta$  were estimated from the linear regression. The  
472 urbanization was modelled by including data on human population density, which  
473 was obtained from Center for International Earth Science Information Network with a  
474 5 km ×5 km resolution (SEDAC and CIESIN, 2015). If the value was missing for a  
475 site, we extracted the corresponding environmental variables based on its coordinate  
476 and used the average drawn from a 5km buffer around the site.

## 477 **Statistical methods**

478 We applied a ZINB regression model to the weekly abundance of *Ae. aegypti* and  
479 *Ae. albopictus* from the longitudinal training dataset, respectively, to account for the  
480 excessive zeros in the abundance data and the over-dispersed count of trapped  
481 mosquitoes, simultaneously. The ZINB model comprises a binary component  
482 (corresponding to the absence/presence of mosquitoes), and a negative binomial  
483 competent (corresponding to the abundance of mosquitoes). The estimates from the  
484 binary component (presented as odds ratio, OR) and the negative binomial  
485 component (presented as incidence rate ratio, IRR) represent the associations  
486 between the potential factors and the occurrence and abundance of these *Aedes*  
487 vectors, respectively. The potential factors included in the ZINB model for both  
488 species are: the previous abundance of *Ae. aegypti* and *Ae. albopictus* up to three  
489 weeks prior, weekly site-specific meteorological factors (i.e. wind speed, maximum  
490 and minimum temperature and relative humidity), human population density and type  
491 of mosquito traps. We examined the potential interaction between *Ae. aegypti* and  
492 *Ae. albopictus* by examining the relationship between the current abundance of one  
493 species with the previous abundance of another species. We used counts of each  
494 species detected in recent weeks to predict future weeks. To do this, we only  
495 considered records when data was available for four consecutive weeks prior. Trap  
496 type was included as an explanatory covariate as each of the traps used has a  
497 different effectiveness in trapping each species. We also included the random effects  
498 at both site level and county level, which were modelled for both components of  
499 ZINB model simultaneously. The detailed equations used for ZINB model are  
500 provided in the Supplementary information. Parameters were estimated by  
501 maximizing the likelihood using “glmmTMB” package (Brooks et al., 2017) in R  
502 version 3.5.0 (R Foundation for Statistical Computing, Vienna, Austria).

503

504 The model fitting was tested by comparing the observations with the predictions of  
505 occurrence and abundance from the longitudinal dataset. We assessed the spatial  
506 pattern by calculating the site-specific mean of residuals. The absence and presence  
507 were assigned as 0 and 1 respectively for calculation purposes. Moran's I was  
508 calculated to assess the spatial autocorrelation (Bivand and Piras, 2015). We  
509 examined the temporal pattern of the model fitting by assessing the monthly 2.5%  
510 and 97.5% quantiles of the difference between the predicted and observed  
511 abundances for the two *Aedes species*.

512

513 We tested the prediction performance of the model both spatially and temporally.  
514 Prediction of a test set was based on a model fit from a training set and comparing  
515 the predicted and observed occurrence and abundance. In the spatial prediction, we  
516 randomly selected records from 127 (around 10% of total) sites to be the spatial  
517 testing set and used the records from the remainder of the sites as a spatial  
518 validation training set (Fig. S5). In the temporal prediction, we used data up to the  
519 year of 2017 as the temporal validation training set to predict data after 2017 (Fig.  
520 S5). The area under the receiver operating characteristic (AUC) was used to  
521 measure the performance of prediction on the mosquito occurrence. In addition, we  
522 also fit a ZINB model to the longitudinal training dataset without using information on  
523 the previous presence and abundance of *Ae. aegypti* and *Ae. albopictus* ("no  
524 abundance model") and applied the "no abundance model" to an external no  
525 abundance testing dataset comprised of the surveillance records in the full dataset  
526 and failed on the four consecutive four-week criteria (Fig. S5).

527

528 **ACKNOWLEDGEMENTS**

529 We thank Nathan Burkett-Cadena and Diana Araya Rojas for helpful discussion. We  
530 thank Adriane Rogers, Caitlin Gill, Caroline Efstathion, Frieda Lamberg, Ashley  
531 Pierre-Saint, Anthony Dennis, Taylor Thrail, Anthony Dennis, Cindy Mulla, Beth  
532 Kovach, Edfred Lontz, Pam Davis, Marah Clark, Matthew Mello, Bill Hockla, Toni  
533 Wright, Leonard Burns, Sherry Burroughs, Jaime Willoughby, Kylie E. Zirbel, Mitch  
534 Smeykal, Katie L Condra, Christopher Reisinger, Brian Lawton, Larry Gast, Kathleen  
535 Story, Wade Brennan, Richard Weaver, Gene Lamire, Terrill Mincey, James McNelly,  
536 Brenda Hunt and Amanda Baker for collecting and providing data. We thank Adam  
537 Shir, Yves Vaughan and Greg King for their help with digitizing the raw data. This  
538 project was supported by CDC Southeastern Center of Excellence in Vector-borne  
539 Diseases (CDC Cooperative Agreement U01CK000510). M.U.G.K. is supported by  
540 The Branco Weiss Fellowship - Society in Science, administered by the ETH Zurich  
541 and acknowledges funding from a Training Grant from the National Institute of Child  
542 Health and Human Development (T32HD040128) and the National Library of  
543 Medicine of the National Institutes of Health (R01LM010812, R01LM011965).  
544 Climate data were obtained from the NASA Langley Research Center POWER  
545 Project funded through the NASA Earth Science Directorate Applied Science  
546 Program.  
547 The opinions expressed in the paper are those of the authors and do not necessarily  
548 represent the views of the United States Government.

549 **AUTHOR CONTRIBUTIONS**

550 B.Y., B.A.B. and D.A.T.C. designed the study. B.Y., B.A.B. and D.A.T.C. wrote the  
551 first draft of the manuscript. B.W.A., R.R.D., G.E.G., M.U.G.K., R.C.R.Jr., H.S., and

552 D.L.S. critically reviewed the manuscript. B.Y. performed the statistical analysis. B.Y.  
553 and B.A.B. collated the mosquito data. C.K.B., P.B., J.B., K.D., J.T.D., D.D., J.M.F.,  
554 S.L.F., R.H., D.F.H., A.H., A.J., B.K., E.L., K.J.L., J.M., R.M., W.P., M.T.R., J.P.S.,  
555 A.S., J.S., C.V., K.F.W. and R.D.X. provided and facilitated the collection of mosquito  
556 surveillance data. All authors contributed substantively to the revising and editing of  
557 the final draft.

### 558 **Conflict of interests**

559 The authors declare no competing financial interests.

### 560 **REFERENCES**

- 561 Bagny L, Delatte H, Quilici S, Fontenille D. 2009. Progressive decrease in aedes  
562 aegypti distribution in reunion Island since the 1900s. *J Med Entomol* **46**:1541–  
563 1545. doi:10.1603/033.046.0644
- 564 Bargielowski IE, Lounibos LP. 2016. Satyrization and satyrization-resistance in  
565 competitive displacements of invasive mosquito species. *Insect Sci* **23**:162–174.  
566 doi:10.1111/1744-7917.12291
- 567 Bargielowski IE, Lounibos LP, Carrasquilla MC. 2013. Evolution of resistance to  
568 satyrization through reproductive character displacement in populations of  
569 invasive dengue vectors. *Proc Natl Acad Sci*. doi:10.1073/pnas.1219599110
- 570 Bivand R, Piras G. 2015. Comparing Implementations of Estimation Methods for  
571 Spatial Econometrics. *J Stat Softw* **63**:1–36. doi:10.18637/jss.v063.i18
- 572 Bonizzoni M, Gasperi G, Chen X, James AA. 2013. The invasive mosquito species  
573 *Aedes albopictus*: Current knowledge and future perspectives. *Trends Parasitol.*  
574 doi:10.1016/j.pt.2013.07.003

- 575 Bowman LR, Runge-Ranzinger S, McCall PJ. 2014. Assessing the Relationship  
576 between Vector Indices and Dengue Transmission: A Systematic Review of the  
577 Evidence. *PLoS Negl Trop Dis*. doi:10.1371/journal.pntd.0002848
- 578 Brady OJ, Golding N, Pigott DM, Kraemer MUG, Messina JP, Reiner Jr RC, Scott  
579 TW, Smith DL, Gething PW, Hay SI. 2014. Global temperature constraints on  
580 *Aedes aegypti* and *Ae. albopictus* persistence and competence for dengue virus  
581 transmission. *Parasit Vectors* **7**:338. doi:10.1186/1756-3305-7-338
- 582 Brady OJ, Johansson M a, Guerra C a, Bhatt S, Golding N, Pigott DM, Delatte H,  
583 Grech MG, Leisnam PT, Maciel-de-Freitas R, Styer LM, Smith DL, Scott TW,  
584 Gething PW, Hay SI. 2013. Modelling adult *Aedes aegypti* and *Aedes albopictus*  
585 survival at different temperatures in laboratory and field condition. *Parasit*  
586 *Vectors* **6**:351. doi:10.1186/1756-3305-6-351
- 587 Brooks ME, Kristensen K, van Benthem KJ, Magnusson A, Berg CW, Nielsen A,  
588 Skaug HJ, Mächler M, Bolker BM. 2017. glmmTMB balances speed and  
589 flexibility among packages for zero-inflated generalized linear mixed modeling.  
590 *R J* **9**:378–400. doi:10.3929/ETHZ-B-000240890
- 591 Charrel RN, Leparc-Goffart I, Gallian P, de Lamballerie X. 2014. Globalization of  
592 Chikungunya: 10 years to invade the world. *Clin Microbiol Infect* **20**:662–663.  
593 doi:10.1111/1469-0691.12694
- 594 Darsie RF, Morris CD. 2003. Keys to the Adult Females and Fourth Instar Larvae of  
595 the Mosquitoes of Florida (Diptera, Culicidae), Technical bulletin (Florida  
596 Mosquito Control Association). Florida Mosquito Control Association.
- 597 de Ázara TMF, Degener CM, Roque RA, Ohly JJ, Geier M, Eiras ÁE. 2013. The  
598 impact of CO<sub>2</sub> on collection of *Aedes aegypti* (Linnaeus) and *Culex*  
599 *quinquefasciatus* say by BG-sentinel® traps in Manaus, Brazil. *Mem Inst*



- 600        *Oswaldo Cruz* **108**:229–232. doi:10.1590/0074-0276108022013016
- 601    Distribution Maps – Florida Mosquito Information. n.d.
- 602        <http://www.floridamosquito.info/distribution-map/>
- 603    Grubaugh ND, Ladner JT, Kraemer MUG, Dudas G, Tan AL, Gangavarapu K, Wiley
- 604        MR, White S, Thézé J, Magnani DM, Prieto K, Reyes D, Bingham AM, Paul LM,
- 605        Robles-Sikisaka R, Oliveira G, Pronty D, Barcellona CM, Metsky HC, Baniecki
- 606        ML, Barnes KG, Chak B, Freije CA, Gladden-Young A, Gnirke A, Luo C,
- 607        MacInnis B, Matranga CB, Park DJ, Qu J, Schaffner SF, Tomkins-Tinch C, West
- 608        KL, Winnicki SM, Wohl S, Yozwiak NL, Quick J, Fauver JR, Khan K, Brent SE,
- 609        Reiner RC, Lichtenberger PN, Ricciardi MJ, Bailey VK, Watkins DI, Cone MR,
- 610        Kopp EW, Hogan KN, Cannons AC, Jean R, Monaghan AJ, Garry RF, Loman
- 611        NJ, Faria NR, Porcelli MC, Vasquez C, Nagle ER, Cummings DAT, Stanek D,
- 612        Rambaut A, Sanchez-Lockhart M, Sabeti PC, Gillis LD, Michael SF, Bedford T,
- 613        Pybus OG, Isern S, Palacios G, Andersen KG. 2017. Genomic epidemiology
- 614        reveals multiple introductions of Zika virus into the United States. *Nature*
- 615        **546**:401–405. doi:10.1038/nature22400
- 616    Hashim NA, Ahmad AH, Talib A, Athaillah F, Krishnan KT. 2018. Co-breeding
- 617        association of *aedes albopictus* (Skuse) and *aedes aegypti* (linnaeus) (Diptera:
- 618        Culicidae) in relation to location and container size. *Trop Life Sci Res* **29**:213–
- 619        227. doi:10.21315/tlsr2018.29.1.14
- 620    Hopperstad KA, Reiskind MH. 2016. Recent Changes in the Local Distribution of
- 621        *Aedes aegypti* (Diptera: Culicidae) in South Florida, USA. *J Med Entomol*
- 622        **53**:836–842. doi:10.1093/jme/tjw050
- 623    Hylton AR. 1967. Low humidity water-retention ability in *Eretmapodites chrysogaster*
- 624        and *Aedes albopictus*. *J Insect Physiol* **13**:153–157. doi:10.1016/0022-

- 625 1910(67)90011-X
- 626 Juliano SA. 2009. Species Interactions Among Larval Mosquitoes: Context  
627 Dependence Across Habitat Gradients. *Annu Rev Entomol* **54**:37–56.  
628 doi:10.1146/annurev.ento.54.110807.090611
- 629 Juliano SA, O’Meara GF, Morrill JR, Cutwa MM. 2002. Desiccation and thermal  
630 tolerance of eggs and the coexistence of competing mosquitoes. *Oecologia*.  
631 doi:10.1007/s004420100811
- 632 Kaplan L, Kendell D, Robertson D, Livdahl T, Khatchikian C. 2010. *Aedes aegypti*  
633 and *Aedes albopictus* in Bermuda: Extinction, invasion, invasion and extinction.  
634 *Biol Invasions* **12**:3277–3288. doi:10.1007/s10530-010-9721-z
- 635 Kendrick K, Stanek D, Blackmore C, Centers for Disease Control and Prevention  
636 (CDC). 2014. Notes from the field: Transmission of chikungunya virus in the  
637 continental United States--Florida, 2014. *MMWR Morb Mortal Wkly Rep*  
638 **63**:1137.
- 639 Kotsakiozi P, Gloria-Soria A, Caccone A, Evans B, Schama R, Martins AJ, Powell  
640 JR. 2017. Tracking the return of *Aedes aegypti* to Brazil, the major vector of the  
641 dengue, chikungunya and Zika viruses. *PLoS Negl Trop Dis* **11**.  
642 doi:10.1371/journal.pntd.0005653
- 643 Kraemer MUG, Sinka ME, Duda KA, Mylne A, Shearer FM, Brady OJ, Messina JP,  
644 Barker CM, Moore CG, Carvalho RG, Coelho GE, Van Bortel W, Hendrickx G,  
645 Schaffner F, Wint GRW, Elyazar IRF, Teng HJ, Hay SI. 2015a. The global  
646 compendium of *Aedes aegypti* and *Ae. albopictus* occurrence. *Sci Data* **2**.  
647 doi:10.1038/sdata.2015.35
- 648 Kraemer MUG, Sinka ME, Duda KA, Mylne AQN, Shearer FM, Barker CM, Moore  
649 CG, Carvalho RG, Coelho GE, Van Bortel W, Hendrickx G, Schaffner F, Elyazar

650 IR, Teng HJ, Brady OJ, Messina JP, Pigott DM, Scott TW, Smith DL, William  
651 Wint GR, Golding N, Hay SI. 2015b. The global distribution of the arbovirus  
652 vectors *Aedes aegypti* and *Ae. Albopictus*. *Elife* **4**. doi:10.7554/eLife.08347  
653 Leta S, Beyene TJ, De Clercq EM, Amenu K, Kraemer MUG, Revie CW. 2018.  
654 Global risk mapping for major diseases transmitted by *Aedes aegypti* and *Aedes*  
655 *albopictus*. *Int J Infect Dis* **67**:25–35. doi:10.1016/j.ijid.2017.11.026  
656 Li Y, Su X, Zhou G, Zhang H, Puthiyakunnon S, Shuai S, Cai S, Gu J, Zhou X, Yan  
657 G, Chen XG. 2016. Comparative evaluation of the efficiency of the BG-Sentinel  
658 trap, CDC light trap and Mosquito-oviposition trap for the surveillance of vector  
659 mosquitoes. *Parasites and Vectors* **9**. doi:10.1186/s13071-016-1724-x  
660 Likos A, Griffin I, Bingham AM, Stanek D, Fischer M, White S, Hamilton J, Eisenstein  
661 L, Atrubin D, Mulay P, Scott B, Jenkins P, Fernandez D, Rico E, Gillis L, Jean R,  
662 Cone M, Blackmore C, McAllister J, Vasquez C, Rivera L, Philip C. 2016. Local  
663 Mosquito-Borne Transmission of Zika Virus — Miami-Dade and Broward  
664 Counties, Florida, June–August 2016. *MMWR Morb Mortal Wkly Rep* **65**:1032–  
665 1038. doi:10.15585/mmwr.mm6538e1  
666 Lounibos LP. 2002. Invasions by insect vectors of human disease. *Annu Rev*  
667 *Entomol* **47**:233–66. doi:10.1146/annurev.ento.47.091201.145206  
668 Lounibos LP, Bargielowski I, Carrasquilla MC, Nishimura N. 2016. Coexistence of  
669 *Aedes aegypti* and *Aedes albopictus* (Diptera: Culicidae) in Peninsular Florida  
670 Two Decades After Competitive Displacements. *J Med Entomol* **53**:1385–1390.  
671 doi:10.1093/jme/tjw122  
672 Lounibos LP, Juliano SA. 2018. Where vectors collide: the importance of  
673 mechanisms shaping the realized niche for modeling ranges of invasive *Aedes*  
674 mosquitoes. *Biol Invasions*. doi:10.1007/s10530-018-1674-7

- 675 Lounibos LP, Kramer LD. 2016. Invasiveness of *aedes aegypti* and *aedes albopictus*  
676 and vectorial capacity for chikungunya virus *Journal of Infectious Diseases*. pp.  
677 S453–S458. doi:10.1093/infdis/jiw285
- 678 Lounibos LP, O’Meara GF, Juliano SA, Nishimura N, Escher RL, Reiskind MH,  
679 Cutwa M, Greene K. 2010. Differential Survivorship of Invasive Mosquito  
680 Species in South Florida Cemeteries: Do Site-Specific Microclimates Explain  
681 Patterns of Coexistence and Exclusion? *Ann Entomol Soc Am*.  
682 doi:10.1603/AN09142
- 683 Lucio PS, Degallier N, Servain J, Hannart A, Durand B, de Souza RN, Ribeiro ZM.  
684 2013. A case study of the influence of local weather on *Aedes aegypti* (L.) aging  
685 and mortality. *J Vector Ecol* **38**:20–37. doi:10.1111/j.1948-7134.2013.12005.x
- 686 Metzger ME, Yoshimizu MH, Padgett KA, Hu R, Kramer VL. 2017. Detection and  
687 Establishment of *Aedes aegypti* and *Aedes albopictus* (Diptera : Culicidae )  
688 Mosquitoes in California , 2011 – 2015. *J Med Entomol* **54**:533–543.  
689 doi:10.1093/jme/tjw237
- 690 Mogi M, Miyagi I, Abadi K, Syafruddin. 1996. Inter- and Intraspecific Variation in  
691 Resistance to Desiccation by Adult *Aedes* (*Stegomyia*) spp. (Diptera: Culicidae)  
692 from Indonesia. *J Med Entomol*. doi:10.1093/jmedent/33.1.53
- 693 Monaghan AJ, Morin CW, Steinhoff DF, et al. 2016. On the Seasonal Occurrence  
694 and Abundance of the Zika Virus Vector Mosquito *Aedes Aegypti* in the  
695 Contiguous United States. *PLoS Curr* **8**.  
696 doi:10.1371/currents.outbreaks.50dfc7f46798675fc63e7d7da563da76
- 697 Muñoz-Jordán JL, Santiago GA, Margolis H, Stark L. 2013. Genetic relatedness of  
698 dengue viruses in Key West, Florida, USA, 2009-2010. *Emerg Infect Dis*  
699 **19**:652–4. doi:10.3201/eid1904.121295

- 700 Muttis E, Balsalobre A, Chuchuy A, Mangudo C, Ciota AT, Kramer LD, Micieli M V.  
701 2018. Factors related to *Aedes aegypti* (Diptera: Culicidae) populations and  
702 temperature determine differences on life-history traits with regional implications  
703 in disease transmission. *J Med Entomol*. doi:10.1093/jme/tjy057
- 704 NASA Prediction of Worldwide Energy Resources. n.d. <https://power.larc.nasa.gov>  
705 National Oceanic and Atmospheric Administration. 2016. National Centers for  
706 Environmental Information by NOAA. *Clim Data Online Find a Stn*.  
707 <https://www.ncdc.noaa.gov/cdo-web/datatools/findstation>
- 708 O'Meara GF, Evans LF, Gettman a D, Cuda JP. 1995. Spread of *Aedes albopictus*  
709 and decline of *Ae. aegypti* (Diptera: Culicidae) in Florida. *J Med Entomol*  
710 **32**:554–562. doi:10.1073/pnas.1303395110
- 711 Padmanabha H, Durham D, Correa F, Diuk-Wasser M, Galvani A. 2012. The  
712 Interactive Roles of *Aedes aegypti* Super-Production and Human Density in  
713 Dengue Transmission. *PLoS Negl Trop Dis* **6**. doi:10.1371/journal.pntd.0001799
- 714 Pebesma E, Gräler B. 2014. Spatio-temporal geostatistics using gstat. *R J* 1–11.  
715 doi:10.1007/978-3-319-17885-1
- 716 Reiskind MH, Lounibos LP. 2013. Spatial and temporal patterns of abundance of  
717 *Aedes aegypti* L. (*Stegomyia aegypti*) and *Aedes albopictus* (Skuse) [*Stegomyia*  
718 *albopictus* (Skuse)] in southern Florida. *Med Vet Entomol* **27**:421–429.  
719 doi:10.1111/mve.12000
- 720 Rey JR, Nishimura N, Wagner B, Braks MAH, O'Connell SM, Lounibos LP. 2006.  
721 Habitat segregation of mosquito arbovirus vectors in south Florida. *J Med*  
722 *Entomol* **43**:1134–41. doi:10.1093/jmedent/43.6.1134
- 723 Rodrigues MDM, Marques GRAM, Serpa LLN, Arduino MDB, Voltolini JC, Barbosa  
724 GL, Andrade VR, De Lima VLC. 2015. Density of *Aedes aegypti* and *Aedes*

- 725 albopictus and its association with number of residents and meteorological  
726 variables in the home environment of dengue endemic area, São Paulo, Brazil.  
727 *Parasites and Vectors* **8**. doi:10.1186/s13071-015-0703-y
- 728 Sallam MF, Fizer C, Pilant AN, Whung PY. 2017. Systematic review: Land cover,  
729 meteorological, and socioeconomic determinants of aedes mosquito habitat for  
730 risk mapping. *Int J Environ Res Public Health*. doi:10.3390/ijerph14101230
- 731 Schmidt CA, Comeau G, Monaghan AJ, Williamson DJ, Ernst KC. 2018. Effects of  
732 desiccation stress on adult female longevity in *Aedes aegypti* and *Ae. albopictus*  
733 (Diptera: Culicidae): results of a systematic review and pooled survival analysis.  
734 *Parasit Vectors* **11**:267. doi:10.1186/s13071-018-2808-6
- 735 SEDAC, CIESIN. 2015. Gridded Population of the World Version 4. *Cent Int Earth*  
736 *Sci Inf Netw* 1–21. doi:10.1128/AAC.03728-14
- 737 Teets FD, Ramgopal MN, Sweeney KD, Graham AS, Michael SF, Isern S. 2014.  
738 Origin of the dengue virus outbreak in Martin County, Florida, USA 2013. *Viral*  
739 *reports* **1–2**:2–8. doi:10.1016/j.virep.2014.05.001
- 740 Tsai PJ, Teng HJ. 2016. Role of *Aedes aegypti* (Linnaeus) and *Aedes albopictus*  
741 (Skuse) in local dengue epidemics in Taiwan. *BMC Infect Dis* **16**.  
742 doi:10.1186/s12879-016-2002-4
- 743 Williams CR, Long S a, Russell RC, Ritchie S a. 2006. Field efficacy of the BG-  
744 Sentinel compared with CDC Backpack Aspirators and CO<sub>2</sub>-baited EVS traps  
745 for collection of adult *Aedes aegypti* in Cairns, Queensland, Australia. *J Am*  
746 *Mosq Control Assoc* **22**:296–300. doi:10.2987/8756-  
747 971X(2006)22[296:FEOTBC]2.0.CO;2
- 748 Wisz MS, Guisan A. 2009. Do pseudo-absence selection strategies influence  
749 species distribution models and their predictions? An information-theoretic

750 approach based on simulated data. *BMC Ecol* **9**. doi:10.1186/1472-6785-9-8  
751 Xu L, Stige LC, Chan K-S, Zhou J, Yang J, Sang S, Wang M, Yang Z, Yan Z, Jiang  
752 T, Lu L, Yue Y, Liu X, Lin H, Xu J, Liu Q, Stenseth NC. 2017. Climate variation  
753 drives dengue dynamics. *Proc Natl Acad Sci* **114**:113–118.  
754 doi:10.1073/pnas.1618558114  
755  
756

757 **TABLES**

758 **Table 1.** Characteristics of surveillance of *Aedes aegypti* and *Aedes albopictus* in  
 759 Florida, 2004-2018.

760

| Characteristic             | Number (%)                    |                              |
|----------------------------|-------------------------------|------------------------------|
|                            | Longitudinal training dataset | No abundance testing dataset |
| <b>Number of Counties</b>  | 33                            | 48                           |
| <b>Number of Sites</b>     | 1,246                         | 2,791                        |
| <b>Number of Trap-days</b> | 235,677                       | 57,469                       |
| <b>Records</b>             | 132,088                       | 45,535                       |
| <i>Aedes aegypti</i>       |                               |                              |
| Absence                    | 115,447 (87.4%)               | 39,384 (86.5%)               |
| Presence                   | 16,641 (12.6%)                | 6,151 (13.5%)                |
| <i>Aedes albopictus</i>    |                               |                              |
| Absence                    | 112,021 (84.8%)               | 35,667 (78.3%)               |
| Presence                   | 20,067 (15.2%)                | 9,868 (21.7%)                |
| <b>Trap Types</b>          |                               |                              |
| Light trap                 | 107,571 (81.4%)               | 31,176 (68.5%)               |
| BG Sentinel                | 9,518 (7.2%)                  | 5,648 (12.4%)                |
| Other trap types           | 14,999 (11.4%)                | 8,711 (19.13%)               |

761

762

763

764



765 **Table 2.** Estimates of odds ratio (OR) and incidence rate ratio (IRR) from mixed-  
 766 effects zero-inflated negative binomial analysis *Aedes aegypti* and *Aedes albopictus*  
 767 in Florida, 2004-2018.  
 768

| Variables                                                    | <i>Aedes aegypti</i>          |                                | <i>Aedes albopictus</i>       |                                |
|--------------------------------------------------------------|-------------------------------|--------------------------------|-------------------------------|--------------------------------|
|                                                              | OR<br>(95% CrI <sup>†</sup> ) | IRR<br>(95% CrI <sup>†</sup> ) | OR<br>(95% CrI <sup>†</sup> ) | IRR<br>(95% CrI <sup>†</sup> ) |
| <b>Previous <i>Ae. aegypti</i> abundance/presence</b>        |                               |                                |                               |                                |
| Trap rate in week <i>t</i> -1                                | 2.46 (2.19, 2.76)*            | 1.03 (1.02, 1.03)*             | 1.21 (1.10, 1.34)*            | 1.00 (1.00, 1.01)              |
| Trap rate in week <i>t</i> -2                                | 2.36 (2.11, 2.65)*            | 1.03 (1.03, 1.03)*             | 1.42 (1.28, 1.57)*            | 1.00 (0.99, 1.00)              |
| Trap rate in week <i>t</i> -3                                | 1.84 (1.64, 2.07)*            | 1.02 (1.01, 1.02)*             | 1.04 (0.94, 1.15)             | 1.00 (1.00, 1.01)              |
| <b>Previous <i>Ae. albopictus</i> abundance/presence</b>     |                               |                                |                               |                                |
| Trap rate in week <i>t</i> -1                                | 1.30 (1.16, 1.47)*            | 0.99 (0.99, 1.00)*†            | 2.48 (2.32, 2.65)*            | 1.02 (1.02, 1.03)*             |
| Trap rate in week <i>t</i> -2                                | 1.44 (1.29, 1.62)*            | 0.99 (0.99, 1.00)*†            | 2.19 (2.05, 2.35)*            | 1.02 (1.01, 1.02)*             |
| Trap rate in week <i>t</i> -3                                | 1.28 (1.14, 1.44)*            | 0.99 (0.99, 1.00)*†            | 1.68 (1.57, 1.80)*            | 1.02 (1.01, 1.02)*             |
| <b>Human population density (100 persons/km<sup>2</sup>)</b> | 1.05 (1.03, 1.07)*            | 1.00 (0.99, 1.02)              | 0.95 (0.94, 0.97)*            | 0.98 (0.97, 1.00)*†            |
| <b>Meteorology</b>                                           |                               |                                |                               |                                |
| Average wind speed (m/s)                                     | 0.98 (0.95, 1.01)             | 0.97 (0.96, 0.99)*             | 0.97 (0.95, 0.99)*            | 0.97 (0.95, 0.98)*             |
| Minimum temperature (°C)                                     | 1.01 (0.99, 1.02)             | 1.13 (1.12, 1.14)*             | 1.08 (1.07, 1.09)*            | 1.09 (1.08, 1.10)*             |
| Maximum temperature (°C)                                     | 1.12 (1.03, 1.21)*            | 0.91 (0.87, 0.95)*             | 1.01 (0.95, 1.06)             | 1.04 (1.00, 1.08)*†            |
| Relative humidity (%)                                        | 1.01 (1.00, 1.02)             | 0.99 (0.98, 1.00)*†            | 0.99 (0.98, 0.99)*            | 1.00 (0.99, 1.00)              |
| <b>Trap type</b>                                             |                               |                                |                               |                                |
| BG sentinel                                                  | Ref.                          | Ref.                           | Ref.                          | Ref.                           |
| Light trap                                                   | 0.00 (0.00, 0.01)*            | 0.40 (0.31, 0.51)*             | 0.77 (0.60, 1.00)*†           | 0.29 (0.24, 0.36)*             |
| Other                                                        | 0.01 (0.00, 0.02)*            | 0.20 (0.14, 0.29)*             | 1.77 (1.28, 2.44)*            | 0.25 (0.19, 0.33)*             |
| <b>Random effects</b>                                        |                               |                                |                               |                                |
| Site                                                         | 1.34                          | 1.67                           | 1.40                          | 0.90                           |
| County                                                       | 12.27                         | 2.82                           | 6.59                          | 1.56                           |
| <b>Dispersion parameter</b>                                  | --                            | 1.46 (1.42, 1.51)              | --                            | 1.13 (1.10, 1.17)              |

769 \* P < 0.05. † Credible interval. ‡ The values with three effective digits for these estimates are (from  
 770 right to left by row): 0.992 (0.987, 0.998), 0.994 (0.988, 0.999), 0.990 (0.985, 0.996), 0.984 (0.969,  
 771 0.998), 1.041 (1.001, 1.083), 0.986 (0.979, 0.994) and 0.775 (0.600, 0.999).  
 772  
 773

774 **FIGURE LEGENDS**

775 **Figure 1. Locations of traps and geographic variation in abundance of *Aedes***  
776 ***aegypti* (A) and *Aedes albopictus* (B) in Florida.** Color (red for *Ae. aegypti*, blue  
777 for *Ae. albopictus*) indicates mean abundance per trap day in each county. Diagonal  
778 lines indicate counties without data. Inset (C) shows the location of Florida (orange)  
779 in the contiguous US. Plot (D) shows *Ae. aegypti* versus *Ae. albopictus* abundances  
780 in each county.

781

782 **Figure 2. Geographic variation in model predictions in occurrence and**  
783 **abundance of *Aedes aegypti* and *Aedes albopictus*.** (A) Occurrence of *Ae.*  
784 *aegypti*. (B) Occurrence of *Ae. albopictus*. (C) Abundance of *Ae. aegypti*. (D)  
785 Abundance of *Ae. albopictus*. Average difference between predictions and  
786 observations was calculated for each trap site.

787

788 **Figure 3. The performance of predictions in occurrence and abundance of**  
789 ***Aedes aegypti* and *Aedes albopictus*.** (A-C) Records from 10% of trap sites were  
790 randomly selected as the test set and records from the rest traps were the train set.  
791 (D-F) Records from 2003 to 2016 were selected as the test set and records on and  
792 after 2017 were in the train set. The model was fit to the training set and predicted  
793 the test set.

794

795 **Figure 4. Maps of predicted counts of *Aedes aegypti* (red, A and C) and *Aedes***  
796 ***albopictus* (blue, B and D) in August 1, 2018 in Florida.** Predictions are derived  
797 from “no abundance model”. Parts A and B show results incorporating random

798 effects representing differences in trapping counts by county. Parts C and D show  
799 results only incorporating fixed effects.

800

801 **Supplementary Figure S1. Spatial and temporal distribution of mosquito**  
802 **surveillance records.** A, *Aedes aegypti*. B, *Aedes albopictus*. Trap sites and  
803 counties were ordered from north (upper) to south (lower). Heatmaps show weekly  
804 trap rate of each trap site. The sidebars indicate whether *Aedes aegypti* or *Aedes*  
805 *albopictus* had ever been reported by each site.

806

807 **Supplementary Figure S2. Weekly presence and absence of *Aedes aegypti* and**  
808 ***Aedes albopictus* in Florida.**

809

810 **Supplementary Figure S3. Relations between occurrence and abundance of**  
811 ***Aedes aegypti* and *Aedes albopictus* with abiotic variables.** Values at x axis are  
812 the minimum, 25<sup>th</sup> quantile, median, 75<sup>th</sup> quantile and maximum value of the  
813 variable. Colored bar charts represent the proportion of occurrence reported by trap  
814 episodes. Colored box plots represent the median and interquartile range of the trap  
815 rate amongst traps where the vector occurred.

816

817 **Supplementary Figure S4. Comparison of trap locations by longitudinal**  
818 **training dataset and external no abundance testing dataset.**

819

820 **Supplementary Figure S5. Comparison of five datasets used in the study.**

821

822 **Supplementary Figure S6. Temporal variation in model predictions in**  
823 **abundance of *Aedes aegypti* (A) and *Aedes albopictus* (B).** Points are the  
824 median difference between predicted and observed abundance of *Aedes aegypti*  
825 and *Ae. albopictus* from the main analysis. Intervals are the 2.5% and 97.5%  
826 quantile of difference between predicted and observed abundance of the two *Aedes*  
827 species. Histograms are the monthly average of observed trap rates.

828

829 **Supplementary Figure S7. Weekly predictions of occurrence of *Aedes aegypti***  
830 **and *Aedes albopictus* from no abundance model in Florida.**

831

832 **Supplementary Figure S8. Geographic distribution of mosquito trap types in**  
833 **the longitudinal training dataset.**

834

835 **Supplementary Figure S9. Correlation between predicted trap rate for *Aedes***  
836 ***aegypti* using longitudinal data with and without data from Miami-Dade.**

837

838 **Figure S10. Maps on predicted abundance of *Aedes aegypti* (red) and *Aedes***  
839 ***albopictus* (blue) in Florida, 2018.** Predictions are derived from “no abundance  
840 model”.

841

842 **Figure 1**

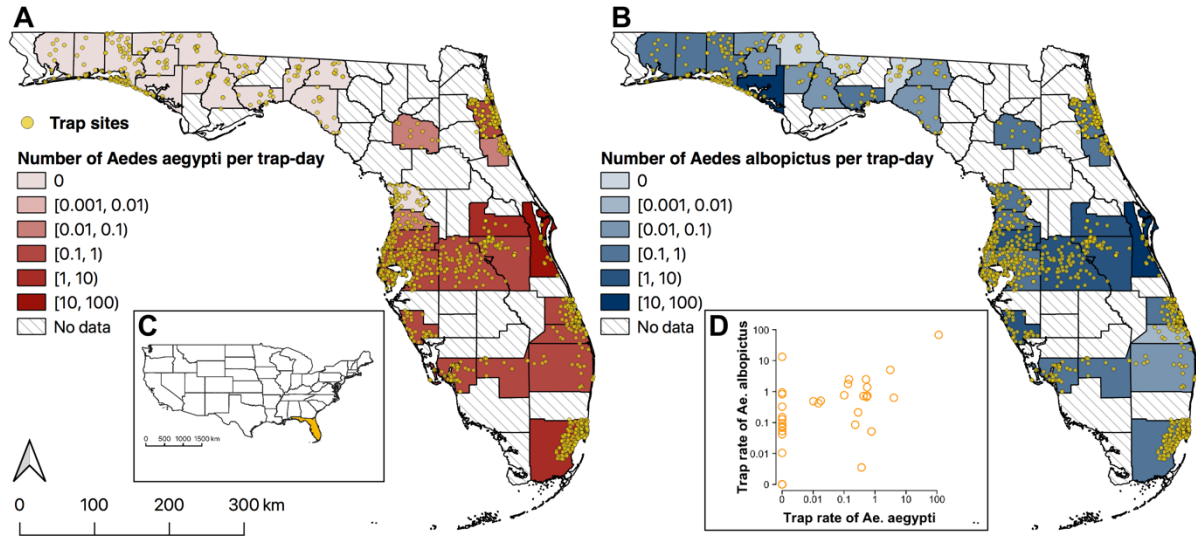

843

844

845

846 **Figure 2**

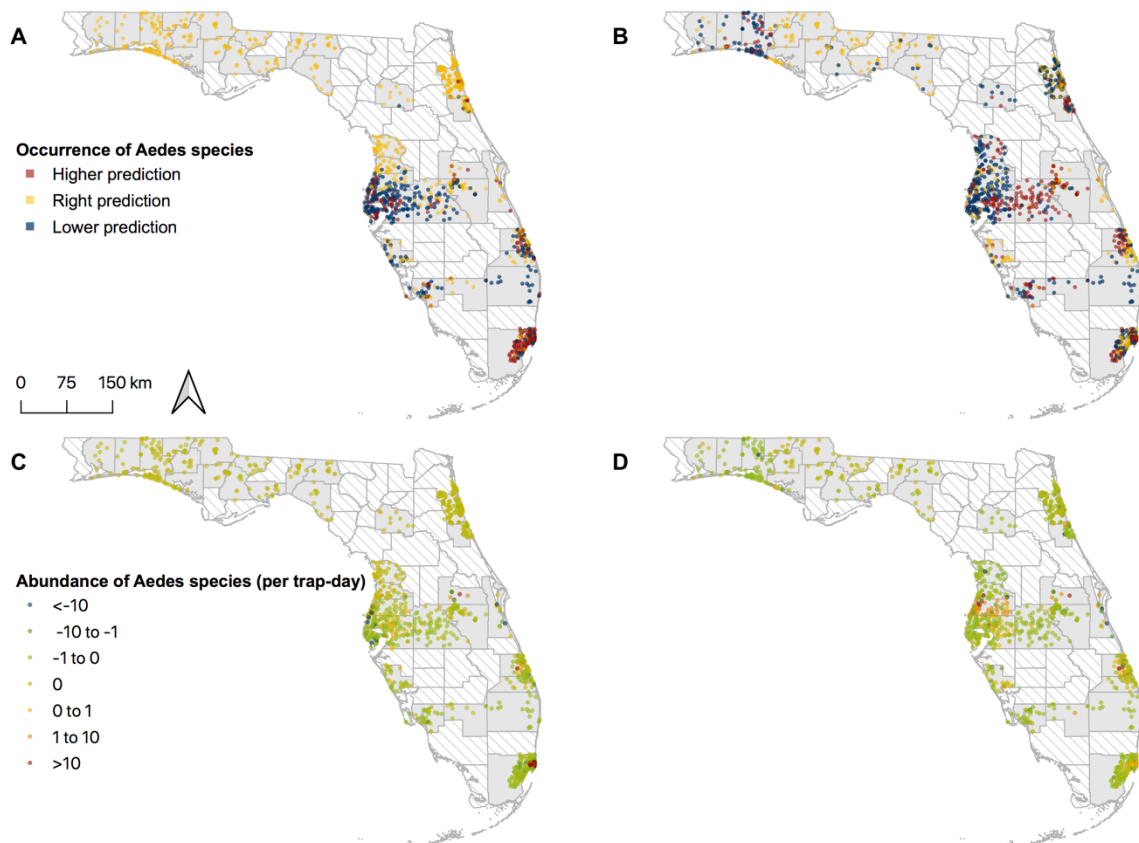

847

848

849

850 **Figure 3**

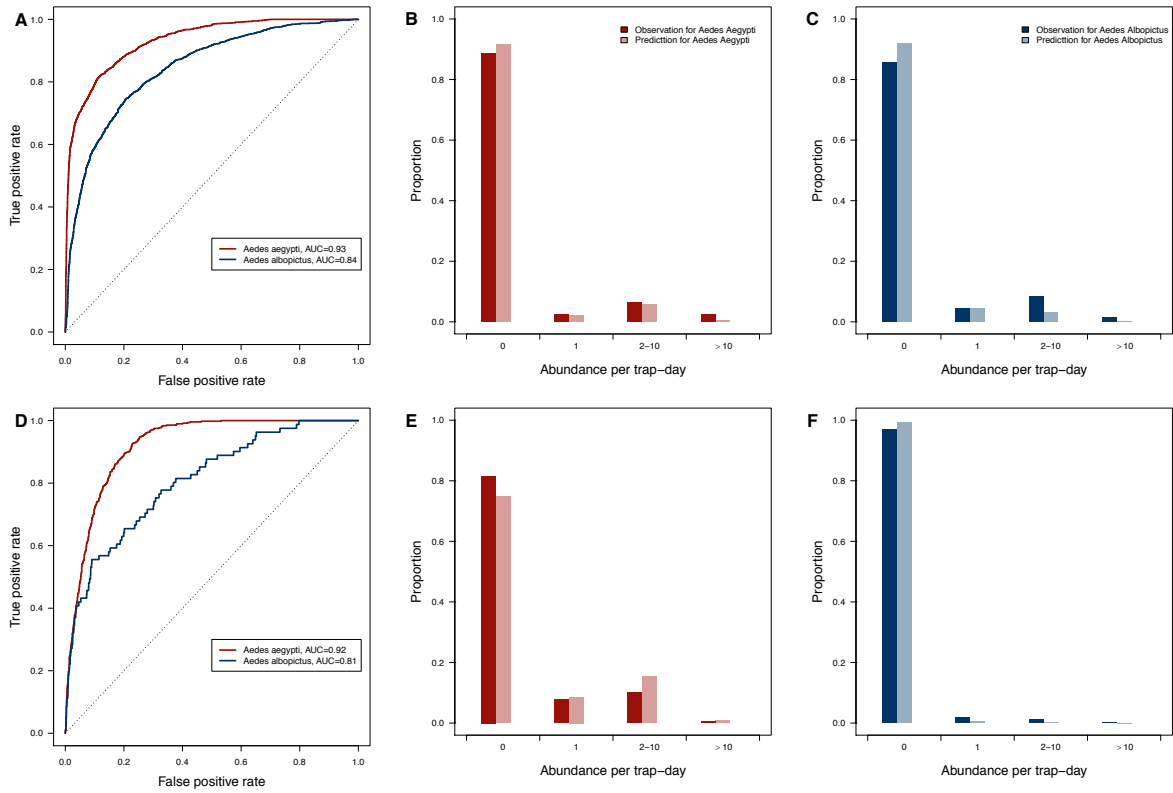

851

852

853 **Figure 4**  
854

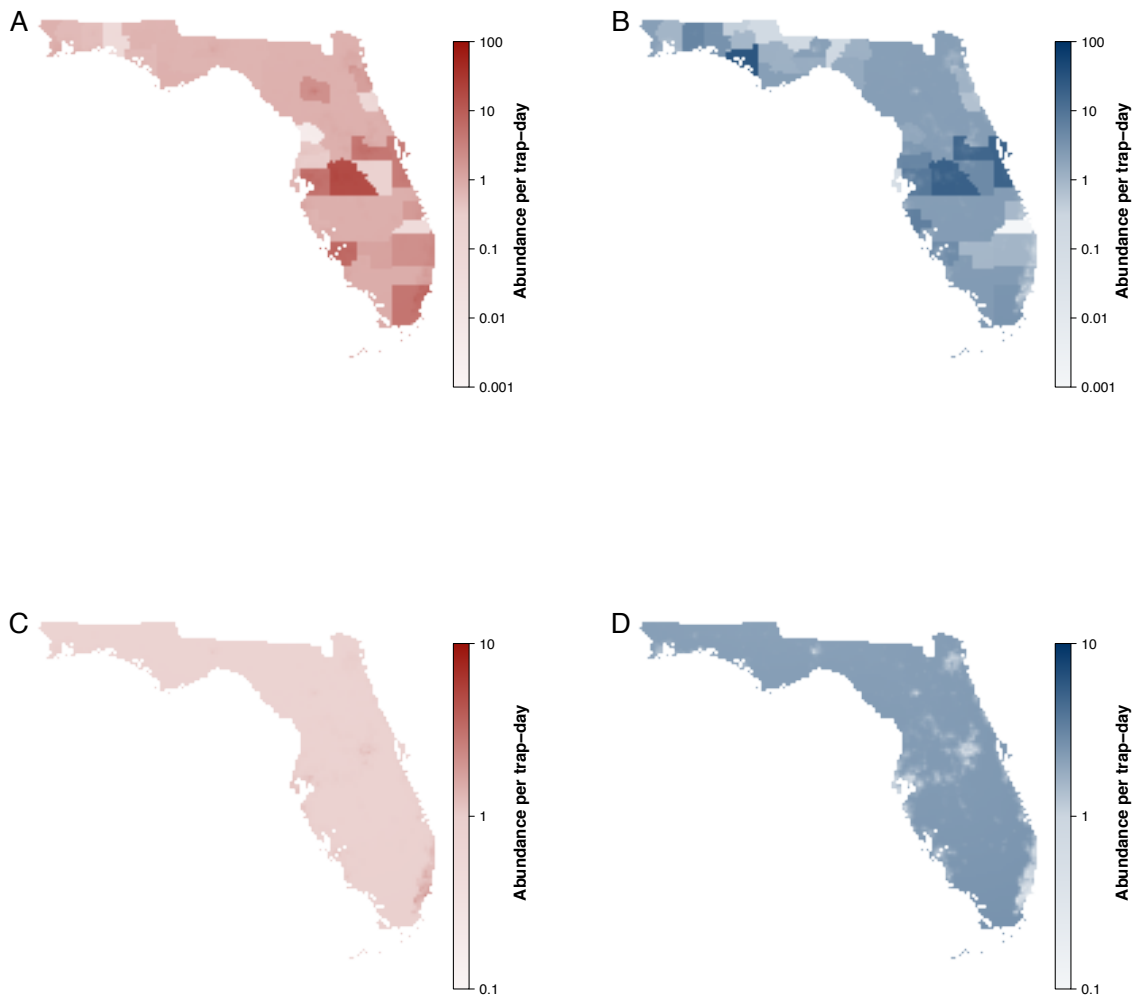

855



856 **Supplement Table S1.** Odds ratio (OR) and incidence rate ratio (IRR) estimate from  
 857 mixed-effects zero-inflated negative binomial analysis of covariates of *Aedes* trap  
 858 rates in Florida using data from NOAA, from 2004 to 2018.

| Variables                                                | <i>Aedes aegypti</i>          |                                | <i>Aedes albopictus</i>       |                                |
|----------------------------------------------------------|-------------------------------|--------------------------------|-------------------------------|--------------------------------|
|                                                          | OR<br>(95% CrI <sup>†</sup> ) | IRR<br>(95% CrI <sup>†</sup> ) | OR<br>(95% CrI <sup>†</sup> ) | IRR<br>(95% CrI <sup>†</sup> ) |
| <b>Previous <i>Ae. aegypti</i> abundance/presence</b>    |                               |                                |                               |                                |
| Trap rate in week <i>t</i> -1                            | 2.44<br>(2.18, 2.74)*         | 1.03<br>(1.02, 1.03)*          | 1.22<br>(1.11, 1.35)*         | 1.00<br>(1.00, 1.01)           |
| Trap rate in week <i>t</i> -2                            | 2.42<br>(2.16, 2.71)*         | 1.03<br>(1.03, 1.03)*          | 1.43<br>(1.29, 1.58)*         | 1.00<br>(0.99, 1.00)           |
| Trap rate in week <i>t</i> -3                            | 1.81<br>(1.61, 2.03)*         | 1.02<br>(1.01, 1.02)*          | 1.05<br>(0.95, 1.16)          | 1.00<br>(1.00, 1.01)           |
| <b>Previous <i>Ae. albopictus</i> abundance/presence</b> |                               |                                |                               |                                |
| Trap rate in week <i>t</i> -1                            | 1.30<br>(1.16, 1.46)*         | 0.99<br>(0.99, 1.00)*          | 2.51<br>(2.35, 2.68)*         | 1.02<br>(1.02, 1.03)*          |
| Trap rate in week <i>t</i> -2                            | 1.46<br>(1.30, 1.64)*         | 0.99<br>(0.99, 1.00)*          | 2.23<br>(2.08, 2.38)*         | 1.02<br>(1.01, 1.02)*          |
| Trap rate in week <i>t</i> -3                            | 1.28<br>(1.14, 1.43)*         | 0.99<br>(0.99, 1.00)*          | 1.70<br>(1.59, 1.82)*         | 1.02<br>(1.01, 1.02)*          |
| <b>Human population density (100/km<sup>2</sup>)</b>     | 1.05<br>(1.03, 1.07)*         | 1.01<br>(0.99, 1.02)           | 0.95<br>(0.94, 0.97)*         | 0.98<br>(0.97, 1.00)*          |
| <b>Meteorology</b>                                       |                               |                                |                               |                                |
| Average wind speed (m/s)                                 | 0.98<br>(0.95, 1.00)*         | 0.97<br>(0.96, 0.98)*          | 0.97<br>(0.96, 0.98)*         | 0.96<br>(0.95, 0.97)*          |
| Minimum temperature (°C)                                 | 1.01<br>(1.00, 1.02)          | 1.11<br>(1.10, 1.11)*          | 1.07<br>(1.06, 1.07)*         | 1.08<br>(1.07, 1.08)*          |
| Maximum temperature (°C)                                 | 1.00<br>(0.96, 1.03)          | 1.08<br>(1.06, 1.11)*          | 1.09<br>(1.06, 1.11)*         | 1.06<br>(1.04, 1.08)*          |
| Precipitation (mm)                                       | 0.85<br>(0.69, 1.05)          | 1.42<br>(1.26, 1.59)*          | 1.05<br>(0.94, 1.19)          | 1.09<br>(0.99, 1.19)           |

---

**Trap type**

|             |                       |                       |                       |                       |
|-------------|-----------------------|-----------------------|-----------------------|-----------------------|
| BG sentinel | Ref.                  | Ref.                  | Ref.                  | Ref.                  |
| Light trap  | 0.00<br>(0.00, 0.01)* | 0.40<br>(0.31, 0.52)* | 0.78<br>(0.60, 1.01)  | 0.30<br>(0.24, 0.37)* |
| Other       | 0.01<br>(0.00, 0.02)* | 0.20<br>(0.14, 0.29)* | 1.76<br>(1.28, 2.43)* | 0.26<br>(0.20, 0.33)* |

**Random effects**

|                             |       |                      |      |                      |
|-----------------------------|-------|----------------------|------|----------------------|
| Site                        | 1.32  | 1.66                 | 1.38 | 0.90                 |
| County                      | 12.24 | 2.82                 | 6.57 | 1.63                 |
| <b>Dispersion parameter</b> | --    | 1.45<br>(1.41, 1.50) | --   | 1.13<br>(1.10, 1.17) |

---

859 \* P < 0.05. † Credible interval

860

861 **Supplement Table S2.** Odds ratio (OR) and incidence rate ratio (IRR) estimate from  
 862 mixed-effects zero-inflated negative binomial analysis of covariates of *Aedes aegypti*  
 863 and *Aedes albopictus* collected from BG traps.

| Variables                                                | <i>Aedes aegypti</i>          |                                | <i>Aedes albopictus</i>       |                                |
|----------------------------------------------------------|-------------------------------|--------------------------------|-------------------------------|--------------------------------|
|                                                          | OR<br>(95% CrI <sup>†</sup> ) | IRR<br>(95% CrI <sup>†</sup> ) | OR<br>(95% CrI <sup>†</sup> ) | IRR<br>(95% CrI <sup>†</sup> ) |
| <b>Previous <i>Ae. aegypti</i> abundance/presence</b>    |                               |                                |                               |                                |
| Trap rate in week <i>t</i> -1                            | 5.16<br>(2.45, 10.87)*        | 1.04<br>(1.03, 1.04)*          | 0.99<br>(0.59, 1.67)          | 1.00<br>(0.99, 1.02)           |
| Trap rate in week <i>t</i> -2                            | 6.61<br>(3.48, 12.54)*        | 1.02<br>(1.02, 1.03)*          | 1.10<br>(0.64, 1.89)          | 1.01<br>(0.99, 1.03)           |
| Trap rate in week <i>t</i> -3                            | 8.58<br>(4.13, 17.85)*        | 1.02<br>(1.01, 1.02)*          | 0.65<br>(0.40, 1.08)          | 1.00<br>(0.98, 1.02)           |
| <b>Previous <i>Ae. albopictus</i> abundance/presence</b> |                               |                                |                               |                                |
| Trap rate in week <i>t</i> -1                            | 0.42<br>(0.22, 0.80)*         | 1.02<br>(1.00, 1.03)*          | 3.27<br>(1.98, 5.41)*         | 1.06<br>(1.04, 1.07)*          |
| Trap rate in week <i>t</i> -2                            | 0.96<br>(0.49, 1.90)          | 0.99<br>(0.98, 1.01)           | 1.12<br>(0.70, 1.79)          | 1.06<br>(1.04, 1.07)*          |
| Trap rate in week <i>t</i> -3                            | 0.78<br>(0.41, 1.50)          | 0.99<br>(0.98, 1.01)           | 3.00<br>(1.89, 4.77)*         | 1.04<br>(1.02, 1.05)*          |
| <b>Human population density (100/km<sup>2</sup>)</b>     | 1.12<br>(1.03, 1.23)*         | 0.99<br>(0.98, 1.01)           | 0.94<br>(0.90, 0.97)*         | 0.99<br>(0.96, 1.02)           |
| <b>Meteorology</b>                                       |                               |                                |                               |                                |
| Average wind speed (m/s)                                 | 1.16<br>(0.99, 1.35)          | 0.97<br>(0.96, 0.99)*          | 1.02<br>(0.92, 1.12)          | 0.91<br>(0.87, 0.96)*          |
| Minimum temperature (°C)                                 | 1.02<br>(0.93, 1.13)          | 1.12<br>(1.11, 1.13)*          | 1.02<br>(0.97, 1.07)          | 1.10<br>(1.07, 1.12)*          |
| Maximum temperature (°C)                                 | 1.25<br>(0.92, 1.70)          | 1.07<br>(1.04, 1.10)*          | 1.02<br>(0.86, 1.21)          | 1.07<br>(0.99, 1.16)           |

|                             |                      |                       |                       |                      |
|-----------------------------|----------------------|-----------------------|-----------------------|----------------------|
| Relative humidity (%)       | 0.31<br>(0.06, 1.53) | 1.58<br>(1.32, 1.89)* | 0.39<br>(0.18, 0.83)* | 1.27<br>(0.93, 1.73) |
| <b>Random effects</b>       |                      |                       |                       |                      |
| Site                        | 0.30                 | 0.60                  | 0.87                  | 0.57                 |
| County                      | 2.36                 | 0.81                  | 4.30                  | 1.19                 |
| <b>Dispersion parameter</b> | --                   | 1.35<br>(1.31, 1.40)  | --                    | 1.10<br>(0.98, 1.23) |

864

865 \* P < 0.05. † Credible interval

866

867 **Supplementary Table S3.** Odds ratio (OR) and incidence rate ratio (IRR) estimate  
 868 from mixed-effects zero-inflated negative binomial analysis of covariates of *Aedes*  
 869 *aegypti* after removing data from Miami-Dade county.

| Variables                                            | <i>Aedes aegypti</i>       |                                    |
|------------------------------------------------------|----------------------------|------------------------------------|
|                                                      | OR (95% CrI <sup>†</sup> ) | IRR (95% CrI <sup>†</sup> )        |
| <b>Previous <i>Ae. Aegypti</i> abundance</b>         |                            |                                    |
| Trap rate of <i>Ae. aegypti</i> in week t-1          | 2.79<br>(2.41, 3.23)*      | 1.03<br>(1.03, 1.04)*              |
| Trap rate of <i>Ae. aegypti</i> in week t-2          | 2.26<br>(1.95, 2.61)*      | 1.03<br>(1.03, 1.04)*              |
| Trap rate of <i>Ae. aegypti</i> in week t-3          | 2.12<br>(1.83, 2.46)*      | 1.02<br>(1.01, 1.03)*              |
| <b>Previous <i>Ae. Albopictus</i> abundance</b>      |                            |                                    |
| 1 Trap rate of <i>Ae. albopictus</i> in week t-      | 1.45<br>(1.27, 1.66)*      | 1.00<br>(0.99, 1.00)               |
| 2 Trap rate of <i>Ae. albopictus</i> in week t-      | 1.48<br>(1.29, 1.70)*      | 0.99<br>(0.98, 1.00)* <sup>†</sup> |
| 3 Trap rate of <i>Ae. albopictus</i> in week t-      | 1.41<br>(1.23, 1.62)*      | 1.00<br>(0.99, 1.00)               |
| <b>Human population density (100/km<sup>2</sup>)</b> | 1.12<br>(1.09, 1.16)*      | 1.08<br>(1.04, 1.12)*              |
| <b>Meteorology</b>                                   |                            |                                    |
| Average wind speed (m/s)                             | 1.03<br>(0.99, 1.08)       | 0.90<br>(0.88, 0.93)*              |
| Minimum temperature (°C)                             | 1.03<br>(1.01, 1.04)*      | 1.09<br>(1.08, 1.10)*              |
| Maximum temperature (°C)                             | 1.02<br>(0.92, 1.13)       | 1.03<br>(0.96, 1.10)               |
| Relative humidity (mm)                               | 1.00<br>(0.98, 1.01)       | 1.01<br>(1.00, 1.02)* <sup>†</sup> |
| <b>Random effects</b>                                |                            |                                    |
| Site                                                 | 1.03                       | 2.28                               |
| County                                               | 10.90                      | 3.39                               |
| <b>Dispersion parameter</b>                          | --                         | 1.89 (1.78, 2.00)                  |

870 \* P < 0.05. † Credible interval. ‡ The values with three effective digits for these  
 871 estimations are: 0.991 (0.984, 0.998) and 1.013 (1.003, 1.023).  
 872

873

874 **Supplementary Table S4.** Summary of other trap types included in the longitudinal  
875 training dataset.

---

| <b>Trap types</b>        | <b>Number of records</b> |
|--------------------------|--------------------------|
| <b>BG sentinel trap</b>  | 9,518 (7.2%)             |
| <b>Light trap</b>        | 107,571 (81.4%)          |
| CDC light traps          | 95,554 (88.8%)           |
| New Jersey light traps   | 8,451 (7.9%)             |
| Non-specific light traps | 3,566 (3.3%)             |
| <b>Other trap types</b>  | 14,999 (11.4%)           |
| Mosquito magnet          | 3,545 (23.6%)            |
| Suction trap             | 3,372 (22.5%)            |
| Propane                  | 2,676 (17.8%)            |
| ABC                      | 1,920 (12.8%)            |
| Gravid trap              | 1,827 (12.2%)            |
| Exit                     | 1,178 (7.9%)             |
| Route                    | 268 (1.8%)               |
| Unknown                  | 139 (0.9%)               |
| Fay prince               | 64 (0.4%)                |
| Wilton trap              | 10 (0.1%)                |

---

876

877

878 **Supplementary Table S5.** Surveillance data by county

| County       | Full             | ZINB             | Spatial Training | Temporal Training | No Abundance Testing |
|--------------|------------------|------------------|------------------|-------------------|----------------------|
| Hillsborough | 24854<br>(14.0%) | 16475<br>(12.5%) | 14861<br>(12.5%) | 16475<br>(12.7%)  | 8379<br>(18.4%)      |
| Pinellas     | 22335<br>(12.6%) | 20058<br>(15.2%) | 18607<br>(15.7%) | 19673<br>(15.2%)  | 2277<br>(5.0%)       |
| St. Johns    | 21872<br>(12.3%) | 17751<br>(13.4%) | 15954<br>(13.4%) | 17751<br>(13.7%)  | 4121<br>(9.1%)       |
| Polk         | 20751<br>(11.7%) | 15543<br>(11.8%) | 12528<br>(10.5%) | 15543<br>(12.0%)  | 5208<br>(11.4%)      |
| Dade         | 18634<br>(10.5%) | 14980<br>(11.3%) | 14129<br>(11.9%) | 14158<br>(10.9%)  | 3654<br>(8.0%)       |
| Lee          | 13812 (7.8%)     | 8045 (6.1%)      | 6613 (5.6%)      | 8045 (6.2%)       | 5767 (12.7%)         |
| Citrus       | 8471 (4.8%)      | 6959 (5.3%)      | 6695 (5.6%)      | 6959 (5.4%)       | 1512 (3.3%)          |
| Walton       | 8380 (4.7%)      | 6186 (4.7%)      | 5890 (5.0%)      | 6106 (4.7%)       | 2194 (4.8%)          |
| Palm Beach   | 7864 (4.4%)      | 7008 (5.3%)      | 6551 (5.5%)      | 6912 (5.3%)       | 856 (1.9%)           |
| Pasco        | 5722 (3.2%)      | 3468 (2.6%)      | 2922 (2.5%)      | 3468 (2.7%)       | 2254 (5.0%)          |
| Osceola      | 4522 (2.5%)      | 2203 (1.7%)      | 1989 (1.7%)      | 2203 (1.7%)       | 2319 (5.1%)          |
| St. Lucie    | 3717 (2.1%)      | 2746 (2.1%)      | 2527 (2.1%)      | 2493 (1.9%)       | 971 (2.1%)           |
| Flagler      | 3715 (2.1%)      | 3150 (2.4%)      | 2880 (2.4%)      | 3118 (2.4%)       | 565 (1.2%)           |
| Martin       | 2660 (1.5%)      | 2561 (1.9%)      | 2453 (2.1%)      | 2350 (1.8%)       | 99 (0.2%)            |
| Alachua      | 2015 (1.1%)      | 1538 (1.2%)      | 1194 (1.0%)      | 1538 (1.2%)       | 477 (1.0%)           |
| Hernando     | 1868 (1.1%)      | 1526 (1.2%)      | 1299 (1.1%)      | 1526 (1.2%)       | 342 (0.8%)           |
| Hendry       | 1052 (0.6%)      | 437 (0.3%)       | 337 (0.3%)       | 437 (0.3%)        | 615 (1.4%)           |
| Sarasota     | 1004 (0.6%)      | 268 (0.2%)       | 249 (0.2%)       | 268 (0.2%)        | 736 (1.6%)           |
| Bay          | 933 (0.5%)       | 137 (0.1%)       | 105 (0.1%)       | 137 (0.1%)        | 796 (1.7%)           |
| Orange       | 724 (0.4%)       | 35 (0%)          | 35 (0%)          | 35 (0%)           | 689 (1.5%)           |
| Okaloosa     | 324 (0.2%)       | 216 (0.2%)       | 216 (0.2%)       | 132 (0.1%)        | 108 (0.2%)           |
| Santa Rosa   | 324 (0.2%)       | 168 (0.1%)       | 168 (0.1%)       | 108 (0.1%)        | 156 (0.3%)           |
| Brevard      | 176 (0.1%)       | 30 (0%)          | 25 (0%)          | 30 (0%)           | 146 (0.3%)           |
| Holmes       | 156 (0.1%)       | 84 (0.1%)        | 84 (0.1%)        | 0 (0%)            | 72 (0.2%)            |
| Liberty      | 150 (0.1%)       | 84 (0.1%)        | 77 (0.1%)        | 0 (0%)            | 66 (0.1%)            |
| Madison      | 149 (0.1%)       | 44 (0%)          | 40 (0%)          | 0 (0%)            | 105 (0.2%)           |
| Bradford     | 137 (0.1%)       | 0 (0%)           | 0 (0%)           | 0 (0%)            | 137 (0.3%)           |
| Wakulla      | 132 (0.1%)       | 82 (0.1%)        | 82 (0.1%)        | 0 (0%)            | 50 (0.1%)            |
| Indian River | 130 (0.1%)       | 0 (0%)           | 0 (0%)           | 0 (0%)            | 130 (0.3%)           |
| Washington   | 130 (0.1%)       | 38 (0%)          | 26 (0%)          | 0 (0%)            | 92 (0.2%)            |
| Taylor       | 120 (0.1%)       | 84 (0.1%)        | 84 (0.1%)        | 0 (0%)            | 36 (0.1%)            |
| Gadsden      | 108 (0.1%)       | 48 (0%)          | 44 (0%)          | 0 (0%)            | 60 (0.1%)            |
| Jackson      | 108 (0.1%)       | 56 (0%)          | 53 (0%)          | 0 (0%)            | 52 (0.1%)            |
| Jefferson    | 108 (0.1%)       | 41 (0%)          | 33 (0%)          | 0 (0%)            | 67 (0.1%)            |
| Calhoun      | 99 (0.1%)        | 39 (0%)          | 31 (0%)          | 0 (0%)            | 60 (0.1%)            |
| Collier      | 91 (0.1%)        | 0 (0%)           | 0 (0%)           | 0 (0%)            | 91 (0.2%)            |
| Gulf         | 65 (0%)          | 0 (0%)           | 0 (0%)           | 0 (0%)            | 65 (0.1%)            |

|            |         |        |        |        |           |
|------------|---------|--------|--------|--------|-----------|
| Charlotte  | 57 (0%) | 0 (0%) | 0 (0%) | 0 (0%) | 57 (0.1%) |
| Escambia   | 40 (0%) | 0 (0%) | 0 (0%) | 0 (0%) | 40 (0.1%) |
| Okeechobee | 31 (0%) | 0 (0%) | 0 (0%) | 0 (0%) | 31 (0.1%) |
| Union      | 15 (0%) | 0 (0%) | 0 (0%) | 0 (0%) | 15 (0%)   |
| Leon       | 13 (0%) | 0 (0%) | 0 (0%) | 0 (0%) | 13 (0%)   |
| Baker      | 10 (0%) | 0 (0%) | 0 (0%) | 0 (0%) | 10 (0%)   |
| Dixie      | 10 (0%) | 0 (0%) | 0 (0%) | 0 (0%) | 10 (0%)   |
| Gilchrist  | 10 (0%) | 0 (0%) | 0 (0%) | 0 (0%) | 10 (0%)   |
| Marion     | 10 (0%) | 0 (0%) | 0 (0%) | 0 (0%) | 10 (0%)   |
| Suwannee   | 10 (0%) | 0 (0%) | 0 (0%) | 0 (0%) | 10 (0%)   |
| Nassau     | 5 (0%)  | 0 (0%) | 0 (0%) | 0 (0%) | 5 (0%)    |
| Total      | 177623  | 132088 | 118781 | 129465 | 45535     |

879



880 **Figure S1**

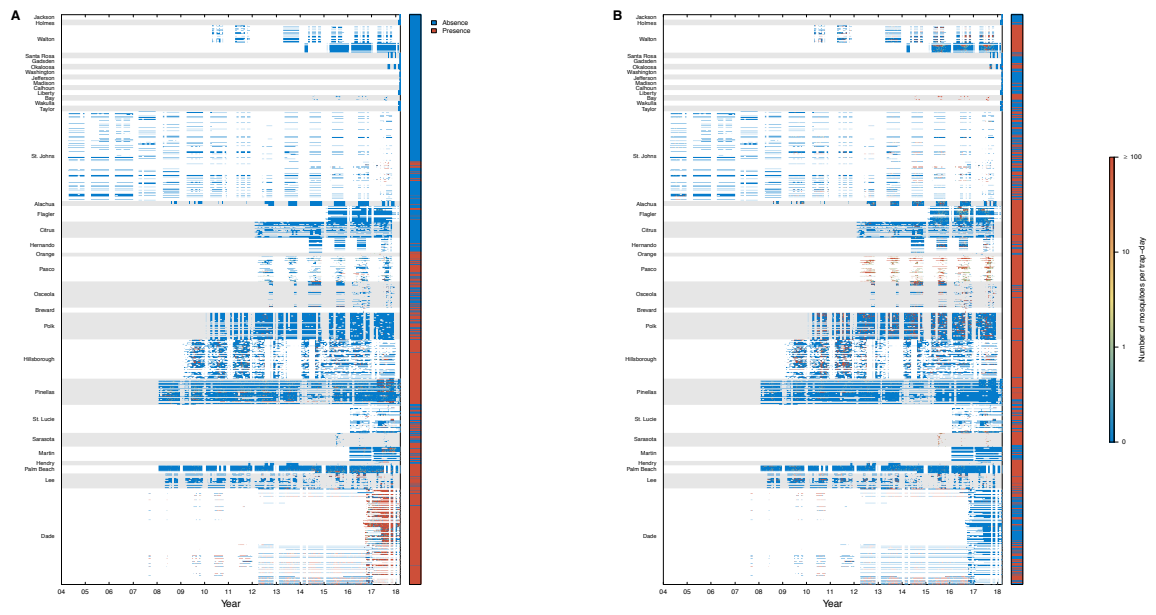

881

882

883 **Figure S2**

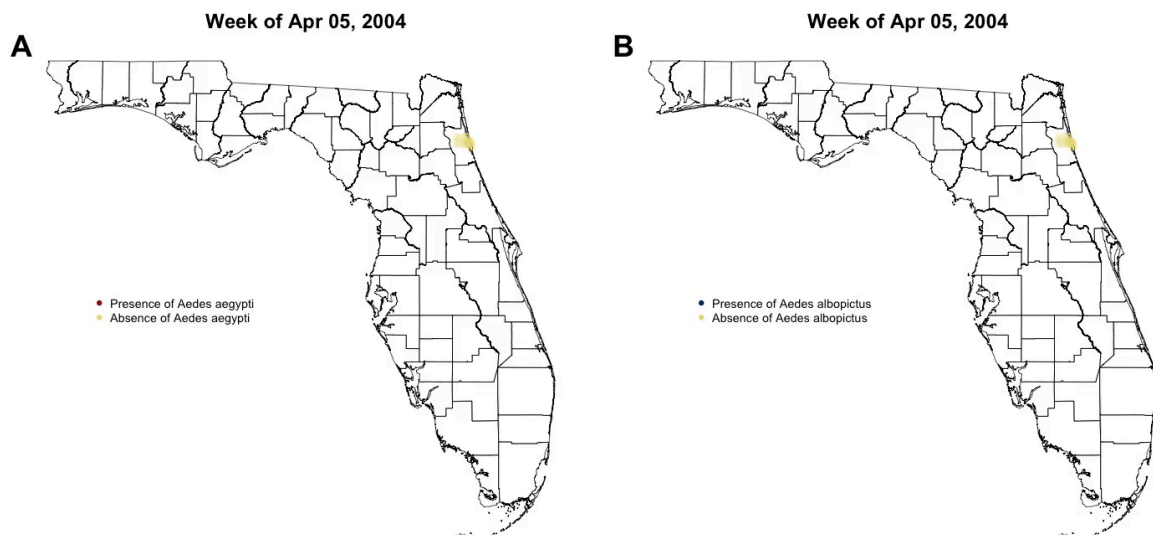

884

885 **Figure S3**

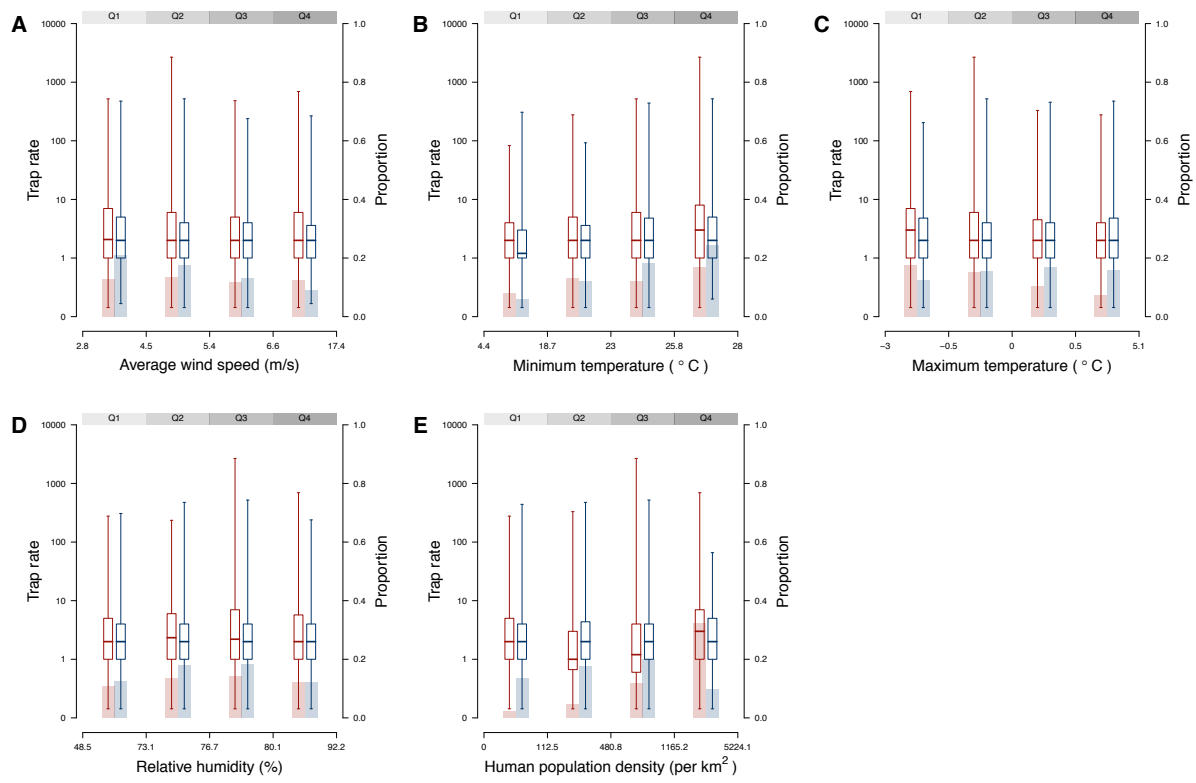

886  
887

888 **Figure S4**

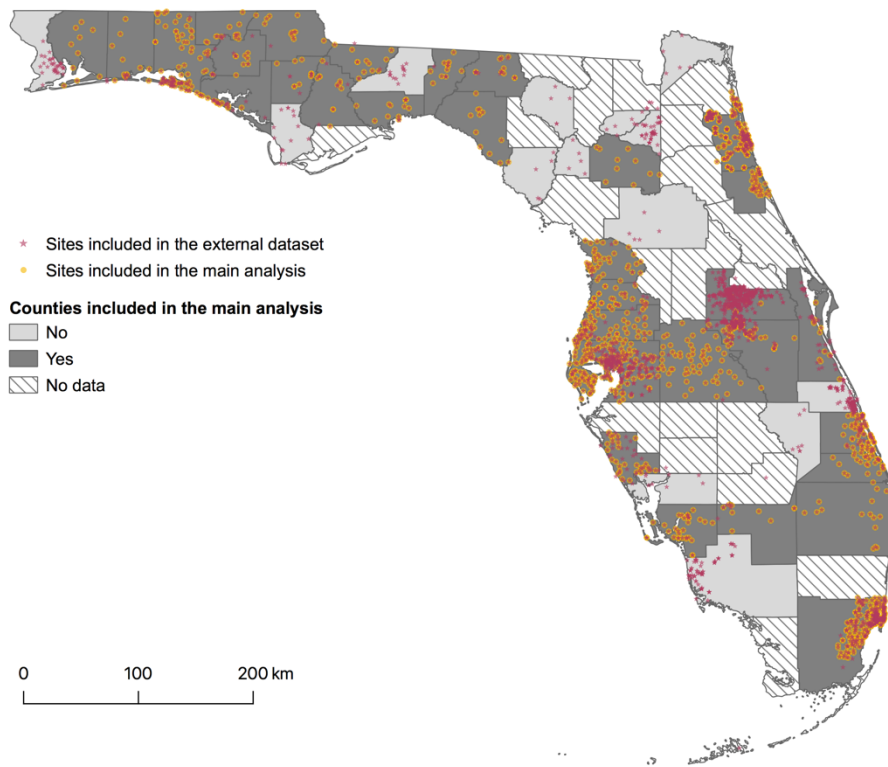

889  
890

891 **Figure S5**

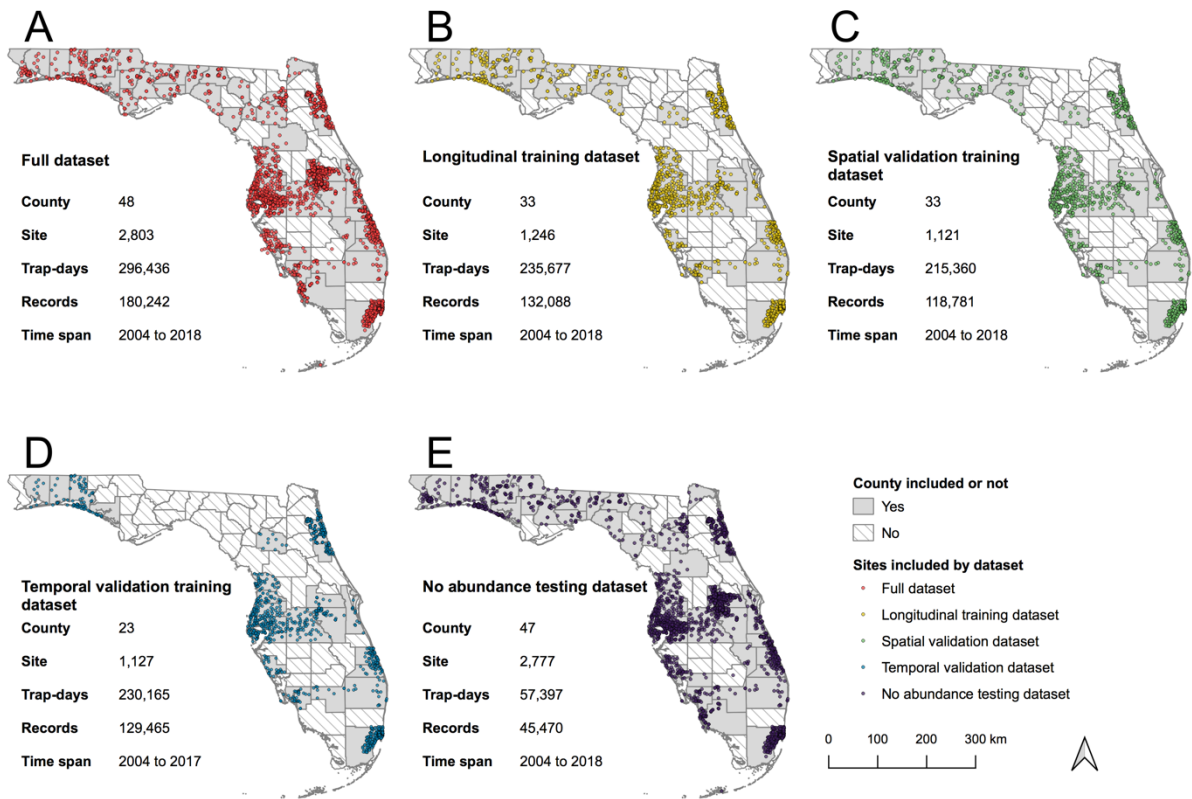

892  
893

894 **Figure S6**

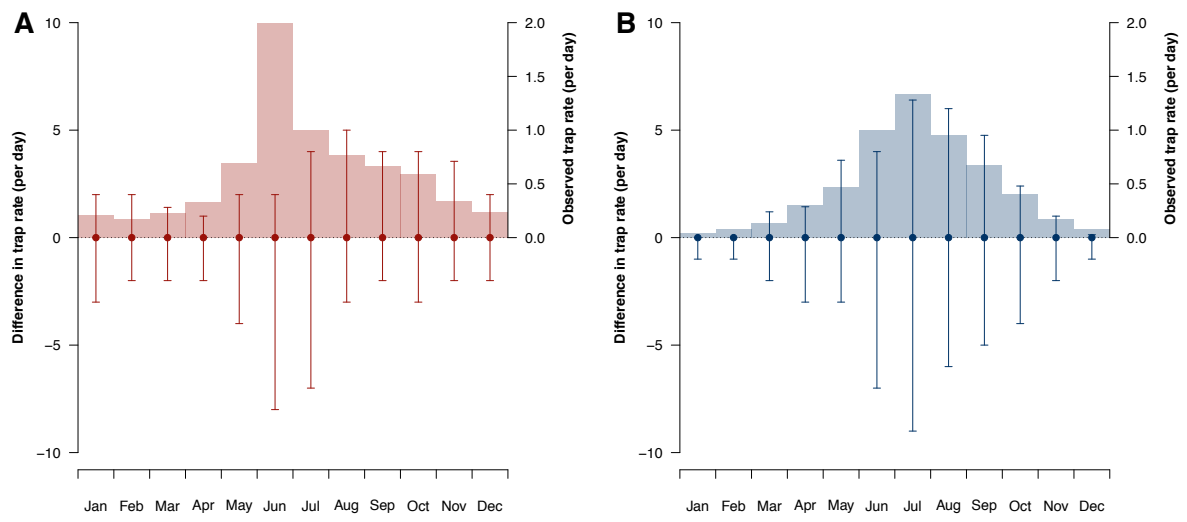

895

896

897 **Figure S7**

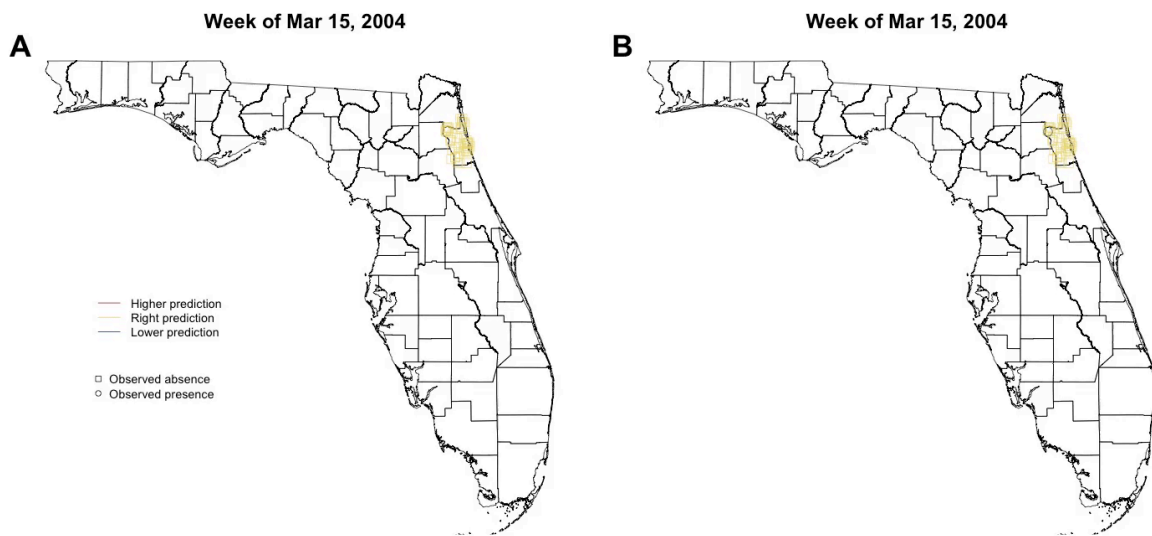

898

899 **Figure S8**

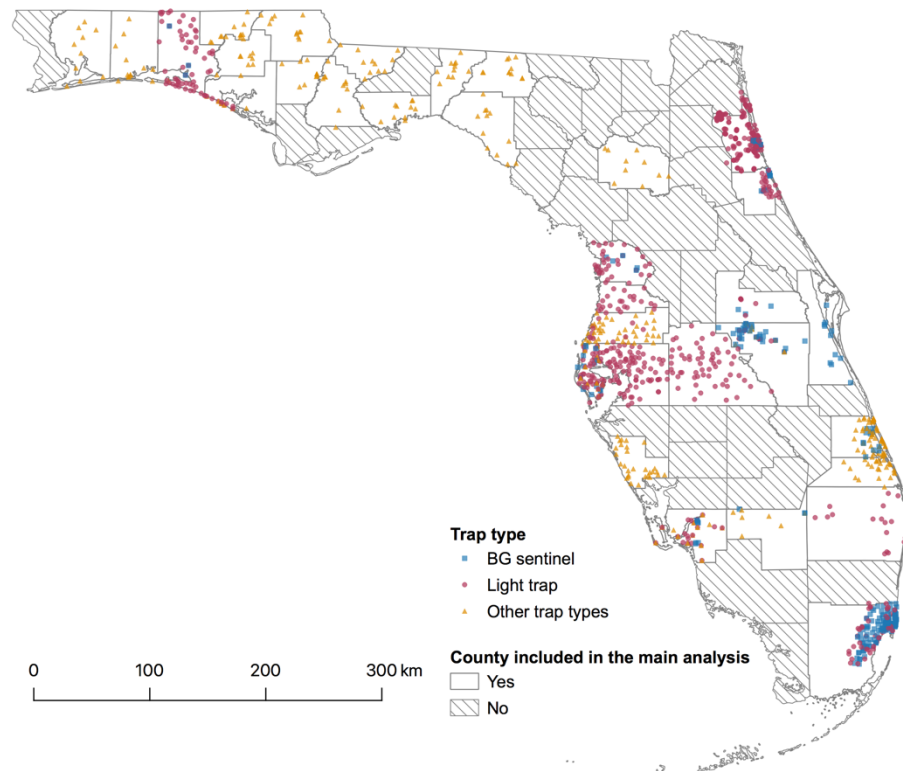

900  
901



902 **Figure S9**

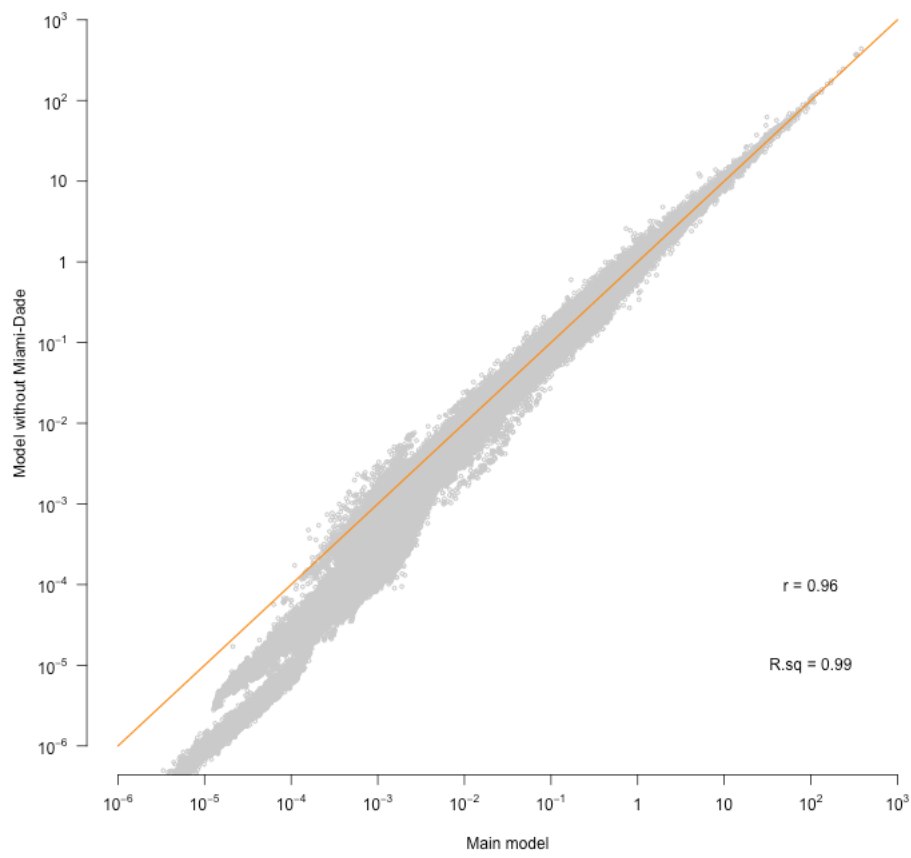

903  
904

905 **Figure S10**

906

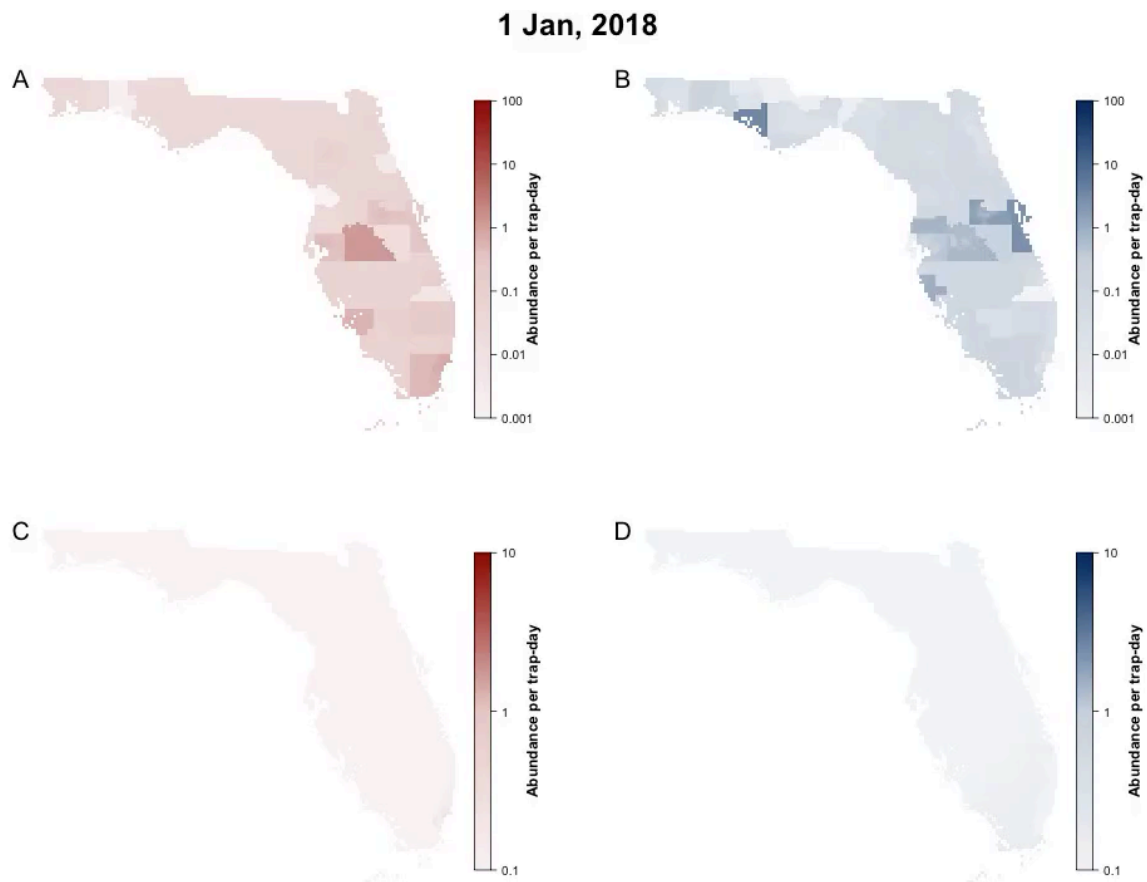

Source: https://www.biorxiv.org/content/10.1101/498238v1.full.pdf
